# Supplementary material for: Zinc Finger Proteins in Head and Neck Squamous Cell Carcinomas: ZNF540 May Serve as a Biomarker
Source: MDPI journal article supplement (doi:10.3390/curroncol29120779), 2022-12-16
Supplement: s1 [file s1]

# Zinc Finger Proteins in Head and Neck Squamous Cell Carcinomas: ZNF540 May Serve as a Biomarker

Joanna Sobocińska <sup>1,2,3</sup>, Joanna Nowakowska <sup>3,6</sup>, Sara Molenda <sup>3</sup>, Anna Olechnowicz <sup>3,7</sup>, Kacper Guglas <sup>1,2,4,\*</sup>, Joanna Kozłowska-Masłoń <sup>1,2,5,\*</sup>, Urszula Kazimierczak <sup>3,†</sup>, Marta Machnik <sup>3,†</sup>, Urszula Oleksiewicz <sup>3,†</sup>, Anna Teresiak <sup>1,2</sup>, Katarzyna Lamperska <sup>1,2</sup> and Tomasz Kolenda <sup>1,2</sup>

**Table S1.** Number of patients' cases analyzed in the groups depending on the specific clinical parameters; *n* - number of cases.

| ZNF                        |          | ZFP28 | ZNF880 | ZNF540 | ZNF418 | ZNF426 | ZNF132 |
|----------------------------|----------|-------|--------|--------|--------|--------|--------|
| Parameter                  | Group    | n     | n      | n      | n      | n      | n      |
| Age                        | < 61     | 258   | 258    | 258    | 258    | 258    | 258    |
|                            | > 61     | 263   | 263    | 263    | 263    | 263    | 263    |
| Gender                     | Female   | 137   | 137    | 137    | 137    | 137    | 173    |
|                            | Male     | 385   | 385    | 385    | 385    | 385    | 385    |
| Alcohol                    | Positive | 348   | 348    | 348    | 348    | 348    | 348    |
|                            | Negative | 163   | 163    | 163    | 163    | 163    | 163    |
| Smoking                    | No/Ex    | 333   | 333    | 333    | 333    | 333    | 333    |
|                            | Yes      | 177   | 177    | 117    | 117    | 177    | 177    |
| Cancer Stage               | I + II   | 101   | 101    | 101    | 101    | 101    | 101    |
|                            | III + IV | 349   | 349    | 349    | 349    | 349    | 349    |
| T stage                    | T1 + T2  | 185   | 185    | 185    | 185    | 185    | 185    |
|                            | T3 + T4  | 274   | 274    | 274    | 274    | 274    | 274    |
| N stage                    | N0 + N1  | 243   | 243    | 243    | 243    | 243    | 243    |
|                            | N2 + N3  | 179   | 179    | 179    | 179    | 179    | 179    |
| Grade                      | G1 + G2  | 368   | 368    | 368    | 368    | 368    | 368    |
|                            | G3 + G4  | 132   | 132    | 132    | 132    | 132    | 132    |
| Perineural Invasion        | Positive | 169   | 169    | 169    | 169    | 169    | 169    |
|                            | Negative | 195   | 195    | 195    | 195    | 195    | 195    |
| Lymph Node Neck Dissection | Positive | 422   | 422    | 422    | 422    | 422    | 422    |
|                            | Negative | 97    | 97     | 97     | 97     | 97     | 97     |
| Angiolymphatic Invasion    | Positive | 125   | 125    | 125    | 125    | 125    | 125    |
|                            | Negative | 225   | 225    | 225    | 225    | 225    | 225    |
| HPV p16 status             | Positive | 39    | 39     | 39     | 39     | 39     | 39     |
|                            | Negative | 73    | 73     | 73     | 73     | 73     | 73     |

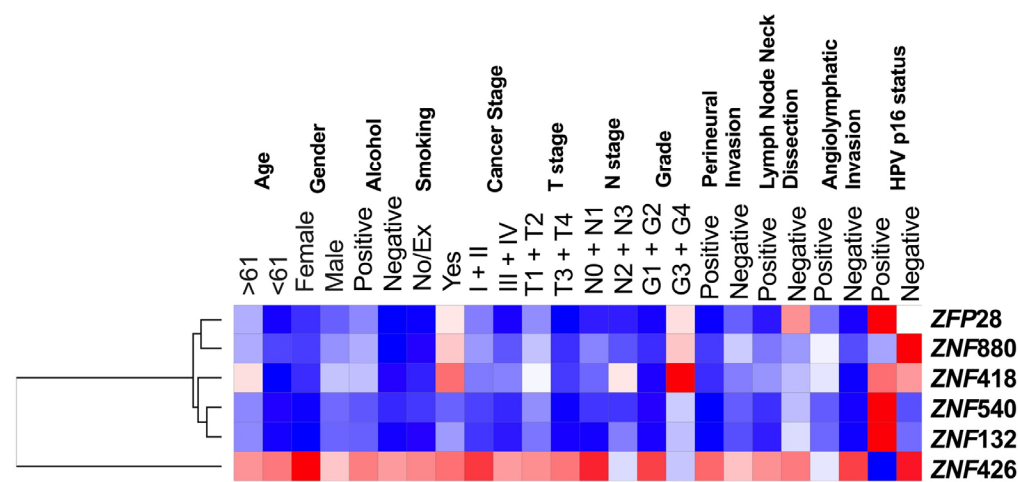

**Figure S1.** Heat map and clustering of mean expression levels of ZNFs depending on the specific clinical parameters.

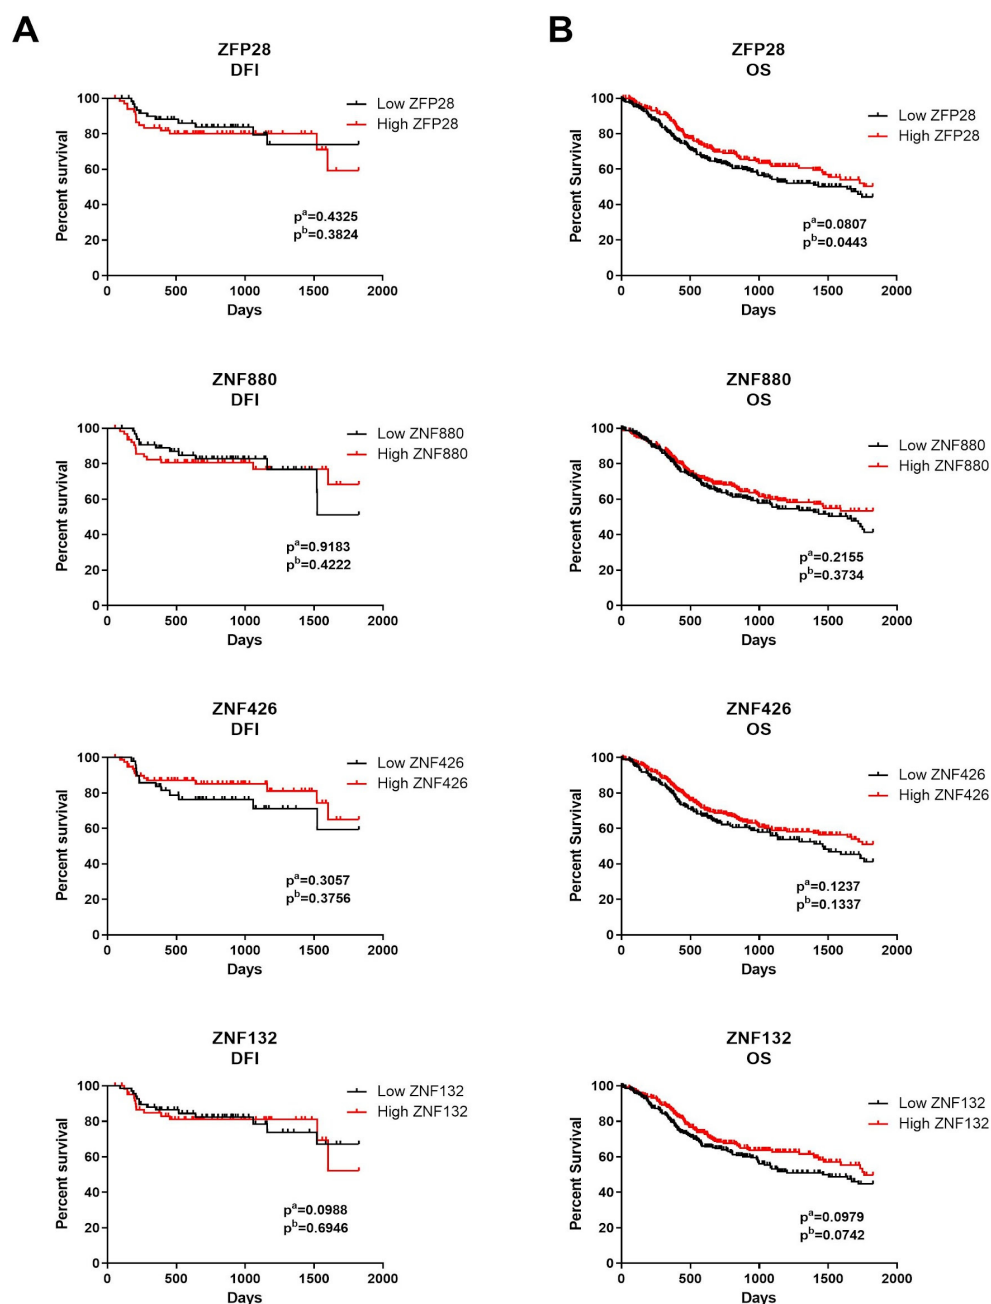

**Figure S2.** A) Disease-free interval (DFI) and B) overall survival (OS) of HNSCC patients depending on the *ZFP28*, *ZNF880*, *ZNF426* and *ZNF132* expression level, respectively. Results presented for 5 years observation, low and high subgroups of patients divided on the mean of expression;  $p^a$  - Long-rank (Mantel-Cox) test;  $p^b$  - Gehan-Breslow-Wilcoxon test;  $p < 0.05$  considered significant.

**Table S2.** Collected genes assigned to pathways positively and negatively correlated with *ZFP28*, *ZNF880*, *ZNF540*, *ZNF418*, *ZNF426*, and *ZNF132*.

| Positively correlated genes with ZFP28 |                                         |
|----------------------------------------|-----------------------------------------|
| Defective CHST6 causes MCDC1           | PRELP, KERA, LUM, OMD, OGN, CHST6, FMOD |

|                                                                                  |                                                                                                                     |
|----------------------------------------------------------------------------------|---------------------------------------------------------------------------------------------------------------------|
| Voltage gated Potassium channels                                                 | <i>KCNQ3, KCNQ1, KCNH2, KCND1, KCNG3, KCNH4, KCNK2, KCNA3, KCNA6, KCNAB2, KCNA5, KCNA2, KCNC3, KCNB2, CNKSR2</i>    |
| Molecules associated with elastic fibers                                         | <i>FBLN1, LTBP3, ELN, EFEMP2, ITGB3, MFAP4, FBLN5, EMILIN1, FBLN2, GDF5, FBN1, ITGA8</i>                            |
| Defective B4GALT1 causes B4GALT1-CDG (CDG-2d)                                    | <i>PRELP, KERA, LUM, OMD, OGN, FMOD</i>                                                                             |
| Defective ST3GAL3 causes MCT12 and EIEE15                                        | <i>PRELP, KERA, LUM, OMD, OGN, FMOD</i>                                                                             |
| Elastic fiber formation                                                          | <i>FBLN1, EFEMP2, ITGB3, EMILIN1, FBN1, ITGA8, LOXL3, LOXL4, LTBP3, ELN, DRP2, MFAP4, FBLN5, FBLN2, LOXL1, GDF5</i> |
| Collagen chain trimerization                                                     | <i>COL9A2, COL6A6, COL8A1, COL6A3, COL8A2, COL9A1, COL4A3, COL14A1, COL4A4, COL15A1, COL19A1</i>                    |
| Diseases associated with glycosaminoglycan metabolism                            | <i>PRELP, CHST14, GPC2, GPC3, OGN, SDC2, CHST6, VCAN, FMOD, KERA, LUM, OMD, PAPSS2, HSPG2, DCN</i>                  |
| Nuclear Receptor transcription pathway                                           | <i>NR2F1, RARB, RORB, PGR, NR1D2, THRA, NR1I2, AR, NR5A2, NR2C2, ESRRG, NR3C2</i>                                   |
| Post-transcriptional silencing by small RNAs                                     | <i>AGO1, TNRC6C, TNRC6B</i>                                                                                         |
| <b>Negatively correlated genes with ZFP28</b>                                    |                                                                                                                     |
| Transport of connexons to the plasma membrane                                    | <i>TUBA4A, TUBB4B, TUBA1C, GJB2, TUBB6</i>                                                                          |
| Prefoldin mediated transfer of substrate to CCT/TriC                             | <i>TUBA4A, TUBB4B, TUBA1C, TUBB6, CCT3</i>                                                                          |
| Formation of the cornified envelope                                              | <i>PKP3, KRT14, KRT16, PKP1, KRT17, JUP, KRT6A, KRT6B, KRT6C, KRT5, KLK8</i>                                        |
| Microtubule-dependent trafficking of connexons from Golgi to the plasma membrane | <i>TUBA4A, TUBB4B, TUBA1C, TUBB6</i>                                                                                |
| Neutrophil degranulation                                                         | <i>GSTP1, PKP1, FABP5, GM2A, ALDOA, PYCARD, S100A11, ATP6V1D, HMOX2, PA2G4, PYGL, S100A12, TUBB4B, JUP,</i>         |

|                                                             |                                                                                                                                  |
|-------------------------------------------------------------|----------------------------------------------------------------------------------------------------------------------------------|
|                                                             | <i>ANXA2, TOLLIP, PGAM1, PNP, AGPAT2, DYNLL1</i>                                                                                 |
| Gap junction trafficking                                    | <i>TUBA4A, TUBB4B, GJB5, GJB6, TUBA1C, GJB3, CLTB, GJB2, TUBB6</i>                                                               |
| Gap junction assembly                                       | <i>TUBA4A, TUBB4B, GJB5, GJB6, TUBA1C, GJB3, GJB2, TUBB6</i>                                                                     |
| Gap junction trafficking and regulation                     | <i>TUBA4A, TUBB4B, GJB5, GJB6, TUBA1C, GJB3, CLTB, GJB2, TUBB6</i>                                                               |
| Carboxyterminal post-translational modifications of tubulin | <i>TUBA4A, TUBB4B, TUBA1C, TUBB6</i>                                                                                             |
| Keratinization                                              | <i>PKP3, KRT14, KRT16, PKP1, KRT17, JUP, KRT6A, KRT6B, KRT6C, KRT5, KLK8</i>                                                     |
| <b>Positively correlated genes with ZNF880</b>              |                                                                                                                                  |
| <b>Molecules associated with elastic fibers</b>             | <i>FBLN1, CD93, EFEMP2, EMILIN1, EMILIN2, FBN1, ITGA8, LTBP3, TGFB3, ELN, MFAP4, FBLN5, GDF5, FBLN2</i>                          |
| Elastic fiber formation                                     | <i>FBLN1, CD93, EFEMP2, EMILIN1, EMILIN2, FBN1, ITGA8, LOXL3, LTBP3, TGFB3, ELN, MFAP4, FBLN5, GDF5, LOXL1, FBLN2</i>            |
| Defective CHST6 causes MCDC1                                | <i>PRELP, KERA, LUM, OMD, OGN, CHST6, FMOD</i>                                                                                   |
| Collagen chain trimerization                                | <i>COL6A5, COL6A6, COL8A1, COL6A3, COL8A2, COL6A1, COL4A3, COL14A1, COL4A4, COL3A1, COL1A2, COL15A1, COL19A1</i>                 |
| Defective B3GALT1 causes Peters-plus syndrome (PpS)         | <i>THSD7A, ADAMTS5, ADAMTS18, SEMA5A, ADAMTS3, ADAMTS2, ADAMTS9, ADAMTS8, ADAMTS10, ADAMTS12, ADAMTSL1, SPON1, CFP</i>           |
| O-glycosylation of TSR domain-containing proteins           | <i>THSD7A, ADAMTS5, ADAMTS18, SEMA5A, ADAMTS3, ADAMTS2, ADAMTS9, ADAMTS8, ADAMTS10, ADAMTS12, ADAMTSL1, SPON1, CFP, TMEM170B</i> |
| Defective B4GALT1 causes B4GALT1-CDG (CDG-2d)               | <i>PRELP, KERA, LUM, OMD, OGN, FMOD</i>                                                                                          |

|                                                              |                                                                                                                                     |
|--------------------------------------------------------------|-------------------------------------------------------------------------------------------------------------------------------------|
| Defective ST3GAL3 causes MCT12 and EIEE15                    | <i>PRELP, KERA, LUM, OMD, OGN, FMOD</i>                                                                                             |
| Diseases associated with glycosaminoglycan metabolism        | <i>PRELP, SDC2, OGN, CHST6, VCAN, FMOD, GPC6, KERA, PSAP, LUM, OMD, PAPSS2, HSPG2, DCN</i>                                          |
| Assembly of collagen fibrils and other multimeric structures | <i>COL6A5, COL6A6, COL8A1, COL6A3, COL8A2, PCOLCE, COL6A1, COL4A3, COL14A1, COL4A4, LOXL3, CTSS, COL3A1, COL1A2, COL15A1, LOXL1</i> |
| <b>Negatively correlated genes with ZNF880</b>               |                                                                                                                                     |
| Formation of the cornified envelope                          | <i>PKP3, KRT17</i>                                                                                                                  |
| Keratinization                                               | <i>PKP3, KRT17</i>                                                                                                                  |
| RAS GTPase cycle mutants                                     | <i>HRAS</i>                                                                                                                         |
| Defective factor XII causes hereditary angioedema            | <i>F12</i>                                                                                                                          |
| Defective SERPING1 causes hereditary angioedema              | <i>F12</i>                                                                                                                          |
| Activation of RAS in B cells                                 | <i>HRAS</i>                                                                                                                         |
| RAS signaling downstream of NF1 loss-of-function variants    | <i>HRAS</i>                                                                                                                         |
| SOS-mediated signalling                                      | <i>HRAS</i>                                                                                                                         |
| Neutrophil degranulation                                     | <i>PA2G4, GSTP1, S100A11</i>                                                                                                        |
| <b>Positively correlated genes with ZNF540</b>               |                                                                                                                                     |
| Terminal pathway of complement                               | <i>C7, C5, C8G, CLU</i>                                                                                                             |
| Phase 3 - rapid repolarization                               | <i>KCNE3, KCNQ1, KCNE2</i>                                                                                                          |
| Interleukin receptor SHC signaling                           | <i>PIK3R3, IL5RA, CSF2RB, INPP5D, IL3RA, JAK3, IL2RG, CSF2RA, IL2</i>                                                               |
| Defective Base Excision Repair Associated with OGG1          | <i>OGG1</i>                                                                                                                         |
| Voltage gated Potassium channels                             | <i>KCNA3, KCNA5, KCNAB2, KCNA2, KCNC3, KCNH8, KCNQ1, CNKSR2, KCND1, KCNH4, KCNAB3</i>                                               |

|                                                                                   |                                                                                                                                                                   |
|-----------------------------------------------------------------------------------|-------------------------------------------------------------------------------------------------------------------------------------------------------------------|
| TNF receptor superfamily (TNFSF) members mediating non-canonical NF-κB pathway    | <i>LTA, PDE4C, LTβ, CD40LG, TNFSF12, TNFRSF13C, MAP3K14</i>                                                                                                       |
| <b>Negatively correlated genes with ZNF540</b>                                    |                                                                                                                                                                   |
| Insulin-like Growth Factor-2 mRNA Binding Proteins (IGF2BPs/IMPs/VICKZs) bind RNA | <i>IGF2BP2, ACTB, MYC, CD44</i>                                                                                                                                   |
| Formation of the cornified envelope                                               | <i>PKP3, PKP1, PI3, KRT6A, KRT6B, KRT6C, CDSN, KRT14, CAPN1, KRT16, FURIN, KRT17, JUP, LCE3D, KRT5, KLK8</i>                                                      |
| Transport of connexons to the plasma membrane                                     | <i>TUBA4A, TUBB3, TUBA1C, GJB2, TUBB6</i>                                                                                                                         |
| Keratinization                                                                    | <i>PKP3, PKP1, PI3, KRT6A, KRT6B, KRT6C, CDSN, KRT14, CAPN1, KRT16, FURIN, KRT17, JUP, LCE3D, KRT5, KLK8</i>                                                      |
| Prefoldin mediated transfer of substrate to CCT/TriC                              | <i>ACTG1, TUBA4A, TUBB3, TUBA1C, TUBB6, ACTB</i>                                                                                                                  |
| Signaling by MAPK mutants                                                         | <i>DUSP6, DUSP7</i>                                                                                                                                               |
| RHO GTPases activate IQGAPs                                                       | <i>ACTG1, TUBA4A, TUBB3, TUBA1C, TUBB6, ACTB</i>                                                                                                                  |
| Type I hemidesmosome assembly                                                     | <i>KRT14, ITGB4, KRT5, PLEC, ITGA6</i>                                                                                                                            |
| Gap junction trafficking                                                          | <i>ACTG1, TUBA4A, TUBB3, GJB5, GJB6, GJB3, TUBA1C, GJB2, TUBB6, RAB11FIP5, ACTB</i>                                                                               |
| Microtubule-dependent trafficking of connexons from Golgi to the plasma membrane  | <i>TUBA4A, TUBB3, TUBA1C, TUBB6</i>                                                                                                                               |
| <b>Positively correlated genes with ZNF418</b>                                    |                                                                                                                                                                   |
| Defective B3GALTL causes Peters-plus syndrome (PpS)                               | <i>SSPO, THSD7A, THSD7B, ADAMTS5, SEMA5B, ADAMTSL2, ADAMTS18, ADAMTSL3, ADAMTS19, ADAMTS2, ADAMTS9, ADAMTS8, ADAMTS10, ADAMTSL1, ADAMTS16, SBSPON, SPON1, CFP</i> |
| O-glycosylation of TSR domain-containing proteins                                 | <i>SSPO, THSD7A, THSD7B, ADAMTS5, SEMA5B, ADAMTSL2, ADAMTS18, ADAMTSL3, ADAMTS19, ADAMTS2, ADAMTS9, ADAMTS8, ADAMTS10,</i>                                        |

|                                                |                                                                                                                                         |
|------------------------------------------------|-----------------------------------------------------------------------------------------------------------------------------------------|
|                                                | <i>ADAMTSL1, ADAMTS16, SBSPON, SPON1, FMNL1, TMEM170B, CFP</i>                                                                          |
| Voltage gated Potassium channels               | <i>KCNQ4, KCNQ3, KCNQ1, KCND1, KCNK2, KCNA3, KCNA6, KCNAB1, KCNAB2, KCNA5, KCNB1, KCNC1, KCNA2, KCNC3, KCNH8, KCNA1, CNKSR2, KCNAB3</i> |
| Defective CHST6 causes MCDC1                   | <i>PRELP, KERA, LUM, OGN, OMD, CHST6, FMOD</i>                                                                                          |
| Molecules associated with elastic fibers       | <i>FBLN1, CD93, EFEMP2, EMILIN1, FBN1, EMILIN2, ITGA8, LTBP3, TGFB3, ELN, MFAP4, FBLN5, GDF5, FBLN2</i>                                 |
| cGMP effects                                   | <i>ITPR1, PDE2A, PDE1A, PDE1B, PDE5A, KCNMB1, ALDH1A1, PDE9A, GIT2, PDE11A, PDE10A, MRVI1</i>                                           |
| Defective B4GALT1 causes B4GALT1-CDG (CDG-2d)  | <i>PRELP, KERA, LUM, OGN, OMD, FMOD</i>                                                                                                 |
| Defective ST3GAL3 causes MCT12 and EIEE15      | <i>PRELP, KERA, LUM, OGN, OMD, FMOD</i>                                                                                                 |
| Collagen chain trimerization                   | <i>COL6A5, COL6A6, COL6A3, COL8A1, COL8A2, COL14A1, COL4A3, COL4A4, PZP, COL3A1, COL15A1, COL1A2, COL19A1</i>                           |
| Elastic fiber formation                        | <i>FBLN1, CD93, EFEMP2, EMILIN1, FBN1, EMILIN2, ITGA8, LOXL3, LOXL4, LTBP3, TGFB3, ELN, DRP2, MFAP4, FBLN5, GDF5, LOXL1, FBLN2</i>      |
| <b>Negatively correlated genes with ZNF418</b> |                                                                                                                                         |
| Transport of connexons to the plasma membrane  | <i>TUBA4A, TUBB4B, TUBA1C, GJB2, TUBB6</i>                                                                                              |
| Formation of the cornified envelope            | <i>KRT14, PKP3, KRT16, PI3, KRT17, JUP, PERP KRT6A, KRT6B</i>                                                                           |
| Gap junction assembly                          | <i>TUBA4A, TUBB4B, GJB5, GJB6, TUBA1C, GJB3, GJB2, TUBB6</i>                                                                            |
| Recruitment of NuMA to mitotic centrosomes     | <i>TUBA4A, TUBB4B, TUBA1C, TUBG1, DYNLL1, TUBB6</i>                                                                                     |
| Gap junction trafficking                       | <i>TUBA4A, TUBB4B, GJB5, GJB6, TUBA1C, GJB3, GJB2, TUBB6</i>                                                                            |



|                                                                                     |                                                                                                                                                                                                                                                                                                |
|-------------------------------------------------------------------------------------|------------------------------------------------------------------------------------------------------------------------------------------------------------------------------------------------------------------------------------------------------------------------------------------------|
| Gap junction trafficking and regulation                                             | <i>TUBA4A, TUBB4B, GJB5, GJB6, TUBA1C, GJB3, GJB2, TUBB6</i>                                                                                                                                                                                                                                   |
| Microtubule-dependent trafficking of connexons from Golgi to the plasma membrane    | <i>TUBA4A, TUBB4B, TUBA1C, TUBB6</i>                                                                                                                                                                                                                                                           |
| Keratinization                                                                      | <i>KRT14, PKP3, KRT16, PI3, KRT17, JUP, PERP, KRT6A, KRT6B</i>                                                                                                                                                                                                                                 |
| Carboxyterminal post-translational modifications of tubulin                         | <i>TUBA4A, TUBB4B, TUBA1C, TUBB6,</i>                                                                                                                                                                                                                                                          |
| Prefoldin mediated transfer of substrate to CCT/TriC                                | <i>TUBA4A, TUBB4B, TUBA1C, TUBB6</i>                                                                                                                                                                                                                                                           |
| <b>Positively correlated genes with ZNF426</b>                                      |                                                                                                                                                                                                                                                                                                |
| Formation of the cornified envelope                                                 | <i>SPINK5, KRT6A, TGM1, DSP, KRT6B, KRT6C, TGM5, CDSN, LIPK, SPRR1A, SPRR1B, LIPM, RPTN, LIPN, KLK14, KLK13, KRT78, FLG2, SPRR3, KLK12, LCE3E, DSG1, PKP1, DSG3, SPRR2E, FLG, SPRR2F, SPRR2G, CAMK2D, SPRR2A, SPRR2B, DSC1, IVL, DSC2, SPRR2D, DSC3, PERP, LCE2C, LCE2B, KRT80, PPL, LCE2D</i> |
| Keratinization                                                                      | <i>SPINK5, KRT6A, TGM1, DSP, KRT6B, KRT6C, TGM5, CDSN, LIPK, SPRR1A, SPRR1B, LIPM, RPTN, LIPN, KLK14, KLK13, KRT78, FLG2, SPRR3, KLK12, LCE3E, DSG1, PKP1, DSG3, SPRR2E, FLG, SPRR2F, SPRR2G, CAMK2D, SPRR2A, SPRR2B, DSC1, IVL, DSC2, SPRR2D, DSC3, PERP, LCE2C, LCE2B, KRT80, PPL, LCE2D</i> |
| Antigen processing: Ubiquitination & Proteasome degradation                         | <i>UBE4A, RBBP6, HECTD1, UBE2H, BTRC, PRMT9, UFL1, ANAPC1, CDH1, ITCH, LMO7, PJA2, KLHL11, UBA6, CUL5, UBE3C, GAN, AP1G1, RNF217, HERC3, KBTBD7, RNF111, TRIP12, UBR1, UBR2, PSME3, PPP2R5E, UBR4, NEDD4, NPEPPS, HACE1, FBXO11, LNPEP, FBXO30, LTN1</i>                                       |
| JNK (c-Jun kinases) phosphorylation and activation mediated by activated human TAK1 | <i>TAB3, NOD2, TAB2, TRAF6, MAP2K4, MAP3K7</i>                                                                                                                                                                                                                                                 |

|                                                             |                                                                                                                                                                                                                                                                                                                                                    |
|-------------------------------------------------------------|----------------------------------------------------------------------------------------------------------------------------------------------------------------------------------------------------------------------------------------------------------------------------------------------------------------------------------------------------|
| activated TAK1 mediates p38 MAPK activation                 | TAB3, NOD2, TAB2, TRAF6, MAP3K7, MAPK14                                                                                                                                                                                                                                                                                                            |
| Neutrophil degranulation                                    | ANK3, PGM2, AMPD3, CDK12, ATP11A, ARG1, ATP11B, ACTR2, SEC24A, DSP, DYNC1H1, CEACAM6, NRAS, RAB6A, CDK13, BTRC, GSDMA, RBM12, MAPK1, CAP1, S100A12, QSOX1, ADAM10, RDX, FLG2, RAB10, SERPINB2, HRNR, IGF2R, HPSE, DSG1, PKP1, IQGAP1, CAB39, PTAFR, COPB1, CYFIP1, CXCR2, CD177, DDX3X, SERPINB12, VCL, DSC1, PRSS3, PAFAH1B2, ROCK1, UBR4, MAPK14 |
| Interleukin-36 pathway                                      | IL36RN, IL36B, IL1RL2, IL36A, IL1F10                                                                                                                                                                                                                                                                                                               |
| RAS signaling downstream of NF1 loss-of-function variants   | NRAS, KRAS                                                                                                                                                                                                                                                                                                                                         |
| Small interfering RNA (siRNA) biogenesis                    | DICER1, AGO4, AGO3                                                                                                                                                                                                                                                                                                                                 |
| Signaling by RAF1 mutants                                   | BRAF, IQGAP1, CAMK2D, NRAS, VCL, KRAS, MAPK1                                                                                                                                                                                                                                                                                                       |
| <b>Negatively correlated genes with ZNF426</b>              |                                                                                                                                                                                                                                                                                                                                                    |
| SRP-dependent cotranslational protein targeting to membrane | RPL35A, RPS2, UBB, RPS19, SSR4, RPS5, SSR2, RPS15, RPS14, TFPT, RPL18, RPS11, RPL39, RPL19, SEC61B, RPL24, RPS20, RPL26, RPL22, RPS9, RPS27L, RPS27, RPL28, RPS24, RPL26L1, RPL13, RPL35, RPL38, RPL10, WBP1, RPL12, RPL34, RPLP1, RPL11, RPL30                                                                                                    |
| Formation of a pool of free 40S subunits                    | RPL35A, RPS2, UBB, RPS19, RPS5, RPS15, RPS14, TFPT, RPL18, RPS11, RPL39, RPL19, RPL24, RPS20, RPL26, RPL22, RPS9, RPS27L, RPS27, RPL28, RPS24, RPL26L1, RPL13, RPL35, RPL38, RPL10, EIF3K, RPL12, RPL34, RPLP1, RPL11, RPL30                                                                                                                       |
| Selenocysteine synthesis                                    | RPL35A, RPS2, UBB, RPS19, RPS5, EEFSEC, RPS15, RPS14, TFPT, RPL18, RPS11, RPL39, RPL19, RPL24, RPS20, RPL26, RPL22, RPS9, RPS27L, RPS27, RPL28, RPS24, RPL26L1, RPL13, RPL35, RPL38, RPL10, RPL12, RPL34, RPLP1, RPL11, RPL30                                                                                                                      |

|                                                                              |                                                                                                                                                                                                                                                                                                     |
|------------------------------------------------------------------------------|-----------------------------------------------------------------------------------------------------------------------------------------------------------------------------------------------------------------------------------------------------------------------------------------------------|
| Eukaryotic Translation Termination                                           | <i>RPL35A, RPS2, UBB, RPS19, RPS5, RPS15, RPS14, TFPT, RPL18, RPS11, RPL39, RPL19, RPL24, RPS20, RPL26, RPL22, RPS9, RPS27L, RPS27, RPL28, RPS24, RPL26L1, RPL13, RPL35, RPL38, RPL10, RPL12, RPL34, RPLP1, RPL11, RPL30</i>                                                                        |
| L13a-mediated translational silencing of Ceruloplasmin expression            | <i>RPL35A, RPS2, UBB, RPS19, RPS5, RPS15, RPS14, TFPT, RPL18, RPS11, RPL39, RPL19, RPL24, RPS20, RPL26, RPL22, RPS9, RPS27L, RPS27, RPL28, RPS24, RPL26L1, RPL13, RPL35, RPL38, RPL10, EIF3K, RPL12, RPL34, RPLP1, RPL11, RPL30</i>                                                                 |
| Nonsense Mediated Decay (NMD) independent of the Exon Junction Complex (EJC) | <i>RPL35A, RPS2, UBB, RPS19, RPS5, RPS15, RPS14, TFPT, RPL18, RPS11, RPL39, RPL19, RPL24, RPS20, RPL26, RPL22, RPS9, RPS27L, RPS27, RPL28, RPS24, RPL26L1, RPL13, RPL35, RPL38, RPL10, RPL12, RPL34, RPLP1, RPL11, RPL30</i>                                                                        |
| Peptide chain elongation                                                     | <i>RPL35A, RPS2, UBB, RPS19, RPS5, RPS15, RPS14, TFPT, RPL18, RPS11, RPL39, RPL19, RPL24, RPS20, RPL26, RPL22, RPS9, RPS27L, RPS27, RPL28, RPS24, RPL26L1, RPL13, RPL35, RPL38, RPL10, RPL12, RPL34, RPLP1, RPL11, RPL30</i>                                                                        |
| Viral mRNA Translation                                                       | <i>RPL35A, RPS2, UBB, RPS19, RPS5, RPS15, RPS14, TFPT, RPL18, RPS11, RPL39, RPL19, RPL24, RPS20, RPL26, RPL22, RPS9, RPS27L, RPS27, RPL28, RPS24, RPL26L1, RPL13, RPL35, RPL38, RPL10, RPL12, RPL34, RPLP1, RPL11, RPL30</i>                                                                        |
| Mitochondrial translation elongation                                         | <i>MRPS21, MRPL27, MRPL28, MRPL47, MRPS25, MRPS24, GADD45GIP1, MRPS26, CHCHD1, MRPL9, AIP, MRPL41, USF2, MRPL40, MRPL23, MRPL24, MRPL43, MRPS2, MRPL22, MRPL16, MRPL38, MRPL58, MRPS12, MRPS34, MRPS11, AURKAIP1, ERAL1, MRPL52, MRPL53, MRPL51, MRPL34, MRPL57, MRPL54, MRPL33, MRPL11, MRPL55</i> |

|                                                                                  |                                                                                                                                                                                                                                                                                                                        |
|----------------------------------------------------------------------------------|------------------------------------------------------------------------------------------------------------------------------------------------------------------------------------------------------------------------------------------------------------------------------------------------------------------------|
| Regulation of expression of SLITs and ROBOs                                      | RPL35A, RPS2, ELOB, UBB, RPS19, RPS5, RPS15, RPS14, TFPT, RPL18, RPS11, RPL39, RPL19, RPL24, RNPS1, RPS20, RPL26, PSMD4, PSMB3, RPL22, PSMB1, MAGOH, PSMB4, RPS9, PSMB10, RBX1, RPS27L, SEM1, RPS27, RPL28, RPS24, RPL26L1, RPL13, RPL35, RPL38, RPL10, RPL12, RPL34, RPLP1, PSMC1, RPL11, RPL30, PSMC5, PSMA4, MAGOHB |
| <b>Positively correlated genes with ZNF132</b>                                   |                                                                                                                                                                                                                                                                                                                        |
| Post-transcriptional silencing by small RNAs                                     | AGO4, AGO1, TNRC6C, TNRC6B                                                                                                                                                                                                                                                                                             |
| Collagen chain trimerization                                                     | COL9A2, COL6A5, COL6A6, COL9A1, COL14A1, COL4A3, COL4A4, DENND4A, COL15A1, COL19A1                                                                                                                                                                                                                                     |
| Nuclear Receptor transcription pathway                                           | NR2F1, RARB, NR1D2, RORB, NR1I2, AR, NR5A2, NR2C2, ESRRG, NR3C2                                                                                                                                                                                                                                                        |
| Competing endogenous RNAs (ceRNAs) regulate PTEN translation                     | AGO4, CNOT6L, AGO1, TNRC6C, TNRC6B                                                                                                                                                                                                                                                                                     |
| Voltage gated Potassium channels                                                 | KCNA3, KCNAB1, KCNA5, KCNAB2, KCNA2, KCNB2, KCNC3, CNKSR2, KCND1, KCNH4,                                                                                                                                                                                                                                               |
| Molecules associated with elastic fibres                                         | LTBP3, ELN, MFAP4, SMCHD1, FBLN5, FBLN2, GDF5, ITGA8                                                                                                                                                                                                                                                                   |
| FGFR2 ligand binding and activation                                              | FGFR2, FGF18, FGF7, FGF2                                                                                                                                                                                                                                                                                               |
| XAV939 stabilizes AXIN                                                           | TNKS                                                                                                                                                                                                                                                                                                                   |
| <b>Negatively correlated genes with ZNF132</b>                                   |                                                                                                                                                                                                                                                                                                                        |
| Prefoldin mediated transfer of substrate to CCT/TriC                             | ACTG1, TUBA4A, TUBB3, PFDN2, TUBB4B, TUBB2A, TUBA1C, CCT7, TUBB6, CCT3, ACTB                                                                                                                                                                                                                                           |
| Transport of connexons to the plasma membrane                                    | TUBA4A, TUBB3, TUBB4B, TUBB2A, TUBA1C, GJB2, TUBB6                                                                                                                                                                                                                                                                     |
| Microtubule-dependent trafficking of connexons from Golgi to the plasma membrane | TUBA4A, TUBB3, TUBB4B, TUBB2A, TUBA1C, TUBB6                                                                                                                                                                                                                                                                           |
| Neutrophil degranulation                                                         | NAPRT, FABP5, TRAPPC1, PYCARD, ALDOA, S100A11, PA2G4, NME2, RHOG, S100A12, TUBB4B, JUP, SLPI, IMPDH1,                                                                                                                                                                                                                  |

|                                                        |                                                                                                                         |
|--------------------------------------------------------|-------------------------------------------------------------------------------------------------------------------------|
|                                                        | <i>TOLLIP, PSMD13, PGAM1, ERP44, PSMB7, PKM, CST3, GSTP1, PKP1, PPIA, ATP6V1D, HMOX2, PYGL, ANXA2, PNP, DYNLL1</i>      |
| RHO GTPases activate IQGAPs                            | <i>ACTG1, TUBA4A, TUBB3, TUBB4B, TUBB2A, TUBA1C, TUBB6, ACTB</i>                                                        |
| Formation of the cornified envelope                    | <i>PKP3, PKP1, PI3, KRT6A, SPINK6, KRT6B, SPRR2G, KRT6C, CDSN, SPRR1B, KRT14, KRT16, KRT17, JUP, LCE3D, KLK8, LCE3E</i> |
| Gap junction trafficking                               | <i>GJB5, GJB6, GJB3, CLTB, TUBB6, ACTG1, TUBA4A, TUBB3, TUBB4B, TUBB2A, TUBA1C, GJB2, ACTB</i>                          |
| Formation of tubulin folding intermediates by CCT/TriC | <i>TUBA4A, TUBB3, TUBB4B, TUBB2A, TUBA1C, CCT7, TUBB6, CCT3</i>                                                         |
| Gap junction trafficking and regulation                | <i>GJB5, GJB6, GJB3, CLTB, TUBB6, ACTG1, TUBA4A, TUBB3, TUBB4B, TUBB2A, TUBA1C, GJB2, ACTB</i>                          |
| Post-chaperonin tubulin folding pathway                | <i>TUBA4A, TUBB3, TUBB4B, TUBB2A, TUBA1C, TUBB6</i>                                                                     |

**Table S3.** Involvement of *ZNFs* transcripts in cellular processes based on GSEA analysis in HNSCC patients. Normalized enrichment scores for GSEA analysis of MSigDB gene sets for oncogenic and hallmark genes sets in the group of patients with low and high expression levels of specified *ZNFs*. Only results set with  $p \leq 0.05$  and  $FDR \leq 0.25$  were shown. NES (normalized enrichment score), p-val (nominal p-value) and FDR q-val (false discovery rate).

| ZFP28 LOW                           |      |                |            |                 |                 |            |
|-------------------------------------|------|----------------|------------|-----------------|-----------------|------------|
| HALLMARK                            |      |                |            |                 |                 |            |
| Process                             | SIZE | ES             | NES        | NOM p-val       | FDR q-val       | FWER p-val |
| HALLMARK_MYC_TARG<br>ETS_V1         | 188  | -0.7033593     | -1.9591562 | 0               | 0.0325078<br>37 | 0.031      |
| ONCOGENIC                           |      |                |            |                 |                 |            |
| Process                             | SIZE | ES             | NES        | NOM p-val       | FDR q-val       | FWER p-val |
| SINGH_KRAS_DEPENDE<br>NCY_SIGNATURE | 20   | -0.7966735     | -1.7382913 | 0.0119284<br>3  | 0.0943668<br>9  | 0.245      |
| RB_P107_DN.V1_DN                    | 111  | 0.4110926<br>7 | -1.6093328 | 0.0184049<br>08 | 0.1488007<br>8  | 0.502      |
| ZFP28 HIGH                          |      |                |            |                 |                 |            |
| HALLMARK                            |      |                |            |                 |                 |            |
| Process                             | SIZE | ES             | NES        | NOM p-val       | FDR q-val       | FWER p-val |

| No process              |      |            | -         |              |             |            |
|-------------------------|------|------------|-----------|--------------|-------------|------------|
| ONCOGENIC               |      |            |           |              |             |            |
| Process                 | SIZE | ES         | NES       | NOM p-val    | FDR q-val   | FWER p-val |
| ESC_V6.5_UP_EARLY.V1_UP | 153  | 0.41845626 | 1.7548374 | 0            | 0.062050827 | 0.245      |
| BRCA1_DN.V1_DN          | 123  | 0.411691   | 1.68942   | 0            | 0.07300265  | 0.367      |
| MTOR_UP.V1_DN           | 170  | 0.45409486 | 1.820618  | 0            | 0.08531365  | 0.139      |
| BRCA1_DN.V1_UP          | 122  | 0.5070129  | 1.888495  | 0            | 0.09420856  | 0.075      |
| IL2_UP.V1_DN            | 172  | 0.48583123 | 1.8270137 | 0            | 0.09847495  | 0.131      |
| KRAS.PROSTATE_UP.V1_UP  | 126  | 0.5140462  | 1.9229596 | 0            | 0.112964265 | 0.045      |
| STK33_DN                | 237  | 0.41059783 | 1.7932984 | 0.0019193857 | 0.063047    | 0.179      |
| MTOR_UP.N4.V1_DN        | 154  | 0.53650737 | 1.7974787 | 0.0019379845 | 0.07784095  | 0.176      |
| STK33_SKM_DN            | 235  | 0.41189855 | 1.7352247 | 0.0019417476 | 0.06588144  | 0.272      |
| IL21_UP.V1_DN           | 166  | 0.4507301  | 1.7976047 | 0.001984127  | 0.09052824  | 0.176      |
| BMI1_DN_MEL18_DN.V1_DN  | 137  | 0.5041968  | 1.878085  | 0.002008032  | 0.07285083  | 0.086      |
| PRC1_BMI_UP.V1_UP       | 168  | 0.43189573 | 1.7296886 | 0.0020283975 | 0.06564677  | 0.284      |
| IL15_UP.V1_DN           | 164  | 0.4607605  | 1.7774625 | 0.0020491802 | 0.061206225 | 0.201      |
| KRAS.BREAST_UP.V1_DN    | 129  | 0.48597175 | 1.7937435 | 0.0020703934 | 0.07078621  | 0.179      |
| EGFR_UP.V1_DN           | 166  | 0.3919127  | 1.5847212 | 0.0037664783 | 0.072305344 | 0.579      |
| STK33_NOMO_DN           | 237  | 0.40316385 | 1.673443  | 0.0039138943 | 0.06845865  | 0.4        |
| GCNP_SHH_UP_EARLY.V1_DN | 157  | 0.39341584 | 1.6434138 | 0.006024096  | 0.06798053  | 0.466      |
| CRX_NRL_DN.V1_UP        | 129  | 0.3669617  | 1.5494833 | 0.006024096  | 0.08243801  | 0.624      |
| RAPA_EARLY_UP.V1_UP     | 153  | 0.37599713 | 1.5618075 | 0.00625      | 0.081019804 | 0.608      |
| JNK_DN.V1_UP            | 170  | 0.43698993 | 1.6787323 | 0.0062761507 | 0.07056176  | 0.39       |
| PTEN_DN.V2_DN           | 125  | 0.3897153  | 1.6050193 | 0.007797271  | 0.072676644 | 0.539      |
| CTIP_DN.V1_UP           | 120  | 0.45687774 | 1.7085323 | 0.007952286  | 0.06766376  | 0.324      |
| P53_DN.V2_DN            | 141  | 0.3707659  | 1.5477594 | 0.007984032  | 0.08199287  | 0.628      |
| E2F3_UP.V1_UP           | 171  | 0.45879358 | 1.7036487 | 0.008016032  | 0.067471534 | 0.339      |
| CYCLIN_D1_KE_V1_DN      | 184  | 0.4035997  | 1.6490792 | 0.00814664   | 0.06719784  | 0.456      |

|                               |     |                |           |                  |                 |       |
|-------------------------------|-----|----------------|-----------|------------------|-----------------|-------|
| VEGF_A_UP.V1_UP               | 185 | 0.4647047<br>5 | 1.7566174 | 0.0082135<br>53  | 0.0661240<br>2  | 0.241 |
| JNK_DN.V1_DN                  | 174 | 0.4551533<br>5 | 1.781058  | 0.0082304<br>52  | 0.0650641<br>84 | 0.198 |
| KRAS.AMP.LUNG_UP.V1_UP        | 130 | 0.4413422      | 1.6418837 | 0.0085106<br>38  | 0.0669324<br>4  | 0.474 |
| NOTCH_DN.V1_UP                | 169 | 0.3896639      | 1.5877337 | 0.0100401<br>6   | 0.0753139<br>5  | 0.572 |
| KRAS.KIDNEY_UP.V1_UP          | 136 | 0.5521734      | 1.7655439 | 0.0101010<br>1   | 0.0659581<br>35 | 0.226 |
| CAHOY_ASTROCYTIC              | 97  | 0.4089668<br>7 | 1.586903  | 0.0117416<br>83  | 0.0741150<br>16 | 0.573 |
| KRAS.600.LUNG.BREAST_UP.V1_DN | 265 | 0.3849388<br>7 | 1.5926368 | 0.0120724<br>35  | 0.0740883<br>05 | 0.564 |
| NOTCH_DN.V1_DN                | 170 | 0.4097423<br>3 | 1.6532688 | 0.0121457<br>49  | 0.0689974<br>8  | 0.44  |
| PRC2_SUZ12_UP.V1_DN           | 169 | 0.3727078<br>4 | 1.5814753 | 0.0121951<br>215 | 0.0727754<br>3  | 0.581 |
| CAHOY_NEURONAL                | 94  | 0.4629674      | 1.6626521 | 0.0125523<br>01  | 0.0688600<br>5  | 0.422 |
| ATF2_UP.V1_DN                 | 170 | 0.4627025<br>4 | 1.6836009 | 0.0138888<br>89  | 0.0705396<br>3  | 0.378 |
| ESC_V6.5_UP_LATE.V1_U<br>P    | 170 | 0.4376104<br>2 | 1.6751012 | 0.0140280<br>565 | 0.0698170<br>6  | 0.396 |
| JAK2_DN.V1_UP                 | 170 | 0.3821609<br>6 | 1.6006777 | 0.0144032<br>92  | 0.0721480<br>85 | 0.548 |
| PTEN_DN.V1_UP                 | 168 | 0.4153383<br>4 | 1.6022748 | 0.0145228<br>22  | 0.0726898<br>5  | 0.546 |
| KRAS.AMP.LUNG_UP.V1_DN        | 126 | 0.4327225<br>4 | 1.6655899 | 0.0145530<br>14  | 0.0697021<br>1  | 0.415 |
| PRC1_BMI_UP.V1_DN             | 171 | 0.3846945<br>2 | 1.6185759 | 0.0151187<br>91  | 0.0696189<br>9  | 0.519 |
| ATF2_S_UP.V1_DN               | 176 | 0.4736425<br>3 | 1.7452166 | 0.0158102<br>77  | 0.0644399<br>15 | 0.259 |
| CAHOY_OLIGODENDRO<br>CUTIC    | 85  | 0.3955319      | 1.5262989 | 0.0158415<br>85  | 0.0884138<br>4  | 0.654 |
| KRAS.300_UP.V1_UP             | 136 | 0.4705382<br>3 | 1.6887871 | 0.0161616<br>17  | 0.0704136       | 0.369 |
| RAPA_EARLY_UP.V1_DN           | 173 | 0.3436187      | 1.4682466 | 0.0164609<br>05  | 0.1127429<br>7  | 0.766 |
| LTE2_UP.V1_UP                 | 176 | 0.3924641<br>6 | 1.5957209 | 0.0191570<br>87  | 0.0735072<br>5  | 0.555 |
| NRL_DN.V1_UP                  | 129 | 0.3494967<br>2 | 1.460184  | 0.0196078<br>44  | 0.1167268<br>46 | 0.792 |
| KRAS.600_UP.V1_UP             | 261 | 0.4583389      | 1.7088232 | 0.0202020<br>2   | 0.0710207       | 0.323 |
| IL21_UP.V1_UP                 | 172 | 0.3773899<br>7 | 1.5468907 | 0.0204081<br>63  | 0.0809231<br>6  | 0.628 |
| BMI1_DN.V1_DN                 | 128 | 0.4168698      | 1.6061801 | 0.0204498<br>97  | 0.0740148<br>4  | 0.539 |
| MEL18_DN.V1_DN                | 137 | 0.4547810<br>3 | 1.6491336 | 0.0214007<br>78  | 0.0692977<br>7  | 0.456 |
| DCA_UP.V1_DN                  | 162 | 0.3440123<br>2 | 1.4968454 | 0.0217391<br>3   | 0.1015385<br>5  | 0.709 |

|                               |      |                |           |                 |                 |            |
|-------------------------------|------|----------------|-----------|-----------------|-----------------|------------|
| PTEN_DN.V1_DN                 | 167  | 0.3903067<br>7 | 1.5519207 | 0.0220883<br>53 | 0.0827004<br>5  | 0.62       |
| AKT_UP.V1_DN                  | 179  | 0.4300792<br>5 | 1.6620604 | 0.0221327<br>97 | 0.0668407<br>9  | 0.424      |
| CSR_LATE_UP.V1_DN             | 131  | 0.4277939      | 1.6382835 | 0.0222672<br>06 | 0.0667448       | 0.484      |
| PRC2_SUZ12_UP.V1_UP           | 172  | 0.3692439<br>5 | 1.5611689 | 0.0223123<br>73 | 0.0797157<br>1  | 0.608      |
| ATF2_S_UP.V1_UP               | 177  | 0.3251966<br>8 | 1.4505827 | 0.0233009<br>7  | 0.1218537<br>54 | 0.801      |
| KRAS.50_UP.V1_UP              | 47   | 0.5456285      | 1.7176628 | 0.0244897<br>96 | 0.0704534<br>05 | 0.309      |
| LEF1_UP.V1_UP                 | 186  | 0.4447504<br>3 | 1.6381508 | 0.0245398<br>77 | 0.0650278<br>5  | 0.484      |
| PKCA_DN.V1_DN                 | 146  | 0.3615935<br>7 | 1.5272518 | 0.0248962<br>66 | 0.0893807<br>6  | 0.653      |
| KRAS.600.LUNG.BREAST_UP.V1_UP | 267  | 0.4079109<br>4 | 1.6299127 | 0.0256410<br>26 | 0.0676913<br>1  | 0.504      |
| PIGF_UP.V1_DN                 | 178  | 0.3852282<br>5 | 1.5867903 | 0.0268041<br>23 | 0.0726241<br>5  | 0.573      |
| WNT_UP.V1_UP                  | 169  | 0.3448856      | 1.4814402 | 0.0270270<br>28 | 0.1062937       | 0.739      |
| P53_DN.V2_UP                  | 142  | 0.421922       | 1.6280116 | 0.0276008<br>49 | 0.0667542<br>7  | 0.506      |
| CTIP_DN.V1_DN                 | 118  | 0.3786531<br>4 | 1.4894131 | 0.0280561<br>13 | 0.1030402<br>7  | 0.729      |
| PRC2_EED_UP.V1_UP             | 174  | 0.3539562<br>8 | 1.4734133 | 0.0309477<br>77 | 0.1105945<br>6  | 0.753      |
| ATF2_UP.V1_UP                 | 181  | 0.3429885<br>2 | 1.4673829 | 0.0336134<br>47 | 0.1117243<br>84 | 0.767      |
| SRC_UP.V1_UP                  | 148  | 0.3920020<br>8 | 1.5065879 | 0.0366598<br>78 | 0.0964695<br>2  | 0.69       |
| RELA_DN.V1_DN                 | 127  | 0.3881461<br>3 | 1.5236872 | 0.0386178<br>87 | 0.0885104<br>5  | 0.659      |
| KRAS.BREAST_UP.V1_UP          | 128  | 0.4019797<br>4 | 1.538174  | 0.04            | 0.0843254<br>3  | 0.64       |
| CYCLIN_D1_UP.V1_DN            | 179  | 0.3274572<br>5 | 1.4013363 | 0.0459081<br>83 | 0.1487338<br>4  | 0.851      |
| ERBB2_UP.V1_UP                | 179  | 0.3773266      | 1.5130033 | 0.0476190<br>5  | 0.0937429<br>1  | 0.68       |
| DCA_UP.V1_UP                  | 166  | 0.3245589      | 1.3904004 | 0.0499002       | 0.1525173<br>5  | 0.861      |
| ZNF132 LOW                    |      |                |           |                 |                 |            |
| HALLMARK                      |      |                |           |                 |                 |            |
| Process                       | SIZE | ES             | NES       | NOM p-val       | FDR q-val       | FWER p-val |
| No process                    |      |                |           | -               |                 |            |
| ONCOGENIC                     |      |                |           |                 |                 |            |
| Process                       | SIZE | ES             | NES       | NOM p-val       | FDR q-val       | FWER p-val |
| No process                    |      |                |           | -               |                 |            |
| ZNF132 HIGH                   |      |                |           |                 |                 |            |
| HALLMARK                      |      |                |           |                 |                 |            |
| Process                       | SIZE | ES             | NES       | NOM p-val       | FDR q-val       | FWER p-val |



|                                     |      |             |            |              |              |            |
|-------------------------------------|------|-------------|------------|--------------|--------------|------------|
| No process                          |      |             |            | -            |              |            |
| ONCOGENIC                           |      |             |            |              |              |            |
| Process                             | SIZE | ES          | NES        | NOM p-val    | FDR q-val    | FWER p-val |
| IL2_UP.V1_DN                        | 172  | 0.48074335  | 1.8123108  | 0.0019305019 | 0.22845033   | 0.141      |
| ZNF418 LOW                          |      |             |            |              |              |            |
| HALLMARK                            |      |             |            |              |              |            |
| Process                             | SIZE | ES          | NES        | NOM p-val    | FDR q-val    | FWER p-val |
| HALLMARK_MYC_TARG<br>ETS_V1         | 188  | 0.70635825  | 1.9595909  | 0.0019607844 | 0.024626149  | 0.034      |
| HALLMARK_MYC_TARG<br>ETS_V2         | 58   | 0.6444798   | 1.6591418  | 0.06346154   | 0.24339326   | 0.359      |
| ONCOGENIC                           |      |             |            |              |              |            |
| Process                             | SIZE | ES          | NES        | NOM p-val    | FDR q-val    | FWER p-val |
| SINGH_KRAS_DEPENDE<br>NCY_SIGNATURE | 20   | 0.7439315   | 1.6562297  | 0.033398822  | 0.13443983   | 0.398      |
| RB_P107_DN.V1_DN                    | 111  | 0.3821421   | 1.5333258  | 0.03285421   | 0.17947969   | 0.641      |
| ZNF418 HIGH                         |      |             |            |              |              |            |
| HALLMARK                            |      |             |            |              |              |            |
| Process                             | SIZE | ES          | NES        | NOM p-val    | FDR q-val    | FWER p-val |
| HALLMARK_KRAS_SIGN<br>ALING_UP      | 193  | -0.5189731  | -1.8128397 | 0.0019493178 | 0.2462509    | 0.126      |
| HALLMARK_COAGULAT<br>ION            | 136  | -0.49198148 | -1.767163  | 0.009633912  | 0.19013539   | 0.183      |
| HALLMARK_IL2_STAT5_<br>SIGNALING    | 194  | -0.4797305  | -1.759137  | 0.009823183  | 0.14186552   | 0.199      |
| HALLMARK_COMPLEME<br>NT             | 195  | -0.46599516 | -1.6740719 | 0.027027028  | 0.16059901   | 0.32       |
| ONCOGENIC                           |      |             |            |              |              |            |
| Process                             | SIZE | ES          | NES        | NOM p-val    | FDR q-val    | FWER p-val |
| KRAS.PROSTATE_UP.V1_<br>UP          | 126  | 0.58782035  | -2.2336104 | 0            | 0            | 0          |
| KRAS.AMP.LUNG_UP.V1_<br>UP          | 130  | 0.54051894  | -2.0606806 | 0            | 0.001913292  | 0.005      |
| PTEN_DN.V1_UP                       | 168  | -0.5262224  | -2.0632331 | 0            | 0.002232174  | 0.005      |
| IL2_UP.V1_DN                        | 172  | -0.5585994  | -2.1607866 | 0            | 0.002267471  | 0.002      |
| KRAS.600_UP.V1_UP                   | 261  | -0.5446241  | -2.0659223 | 0            | 0.002372522  | 0.004      |
| IL15_UP.V1_DN                       | 164  | -0.5035248  | -1.9823798 | 0            | 0.0025143845 | 0.021      |
| KRAS.AMP.LUNG_UP.V1_<br>DN          | 126  | -0.546705   | -2.1095316 | 0            | 0.0025592665 | 0.003      |

|                               |     |                     |            |   |                  |       |
|-------------------------------|-----|---------------------|------------|---|------------------|-------|
| IL21_UP.V1_DN                 | 166 | -<br>0.4954881<br>4 | -2.0160117 | 0 | 0.0025682<br>386 | 0.014 |
| BRCA1_DN.V1_DN                | 123 | -<br>0.4788843<br>4 | -1.9826748 | 0 | 0.0026820<br>102 | 0.021 |
| CTIP_DN.V1_UP                 | 120 | -<br>0.5453158<br>6 | -2.0308762 | 0 | 0.0027760<br>696 | 0.011 |
| BMI1_DN_MEL18_DN.V1_DN        | 137 | -<br>0.5415358<br>5 | -2.0172582 | 0 | 0.0028250<br>625 | 0.014 |
| BRCA1_DN.V1_UP                | 122 | -0.5335266          | -1.9853559 | 0 | 0.0028735<br>823 | 0.021 |
| KRAS.BREAST_UP.V1_DN          | 129 | -0.5525263          | -2.069255  | 0 | 0.0029656<br>522 | 0.004 |
| ATF2_S_UP.V1_DN               | 176 | -0.5485492          | -1.9883087 | 0 | 0.0030135<br>585 | 0.02  |
| JNK_DN.V1_UP                  | 170 | -<br>0.5121705<br>5 | -2.0174675 | 0 | 0.0031389<br>585 | 0.014 |
| JNK_DN.V1_DN                  | 174 | -0.5023681          | -1.9893346 | 0 | 0.0031606<br>69  | 0.019 |
| PTEN_DN.V1_DN                 | 167 | -0.4804555          | -1.9537499 | 0 | 0.0040733<br>814 | 0.034 |
| ATF2_UP.V1_DN                 | 170 | -0.5226324          | -1.9297507 | 0 | 0.0047080<br>237 | 0.044 |
| PRC2_SUZ12_UP.V1_DN           | 169 | -<br>0.4456909<br>3 | -1.9306606 | 0 | 0.0049695<br>81  | 0.044 |
| DCA_UP.V1_UP                  | 166 | -<br>0.4411171<br>7 | -1.8949682 | 0 | 0.0060598<br>324 | 0.065 |
| NOTCH_DN.V1_DN                | 170 | -<br>0.4711827<br>3 | -1.9080054 | 0 | 0.0061417<br>907 | 0.058 |
| CSR_LATE_UP.V1_DN             | 131 | -0.490256           | -1.8905959 | 0 | 0.0061941<br>384 | 0.068 |
| CYCLIN_D1_KE_.V1_DN           | 184 | -0.4626264          | -1.8963137 | 0 | 0.0062055<br>78  | 0.064 |
| P53_DN.V2_DN                  | 141 | -<br>0.4431821<br>7 | -1.8760443 | 0 | 0.0062493<br>46  | 0.078 |
| KRAS.600.LUNG.BREAST_UP.V1_DN | 265 | -<br>0.4553523<br>4 | -1.8769166 | 0 | 0.0064332<br>52  | 0.077 |
| MEL18_DN.V1_DN                | 137 | -<br>0.5128081<br>4 | -1.8598994 | 0 | 0.0064573<br>325 | 0.093 |
| BMI1_DN.V1_DN                 | 128 | -0.4769156          | -1.8621953 | 0 | 0.0066023<br>23  | 0.089 |
| KRAS.600.LUNG.BREAST_UP.V1_UP | 267 | -<br>0.4585180<br>6 | -1.878191  | 0 | 0.0066334<br>005 | 0.076 |

|                            |     |                     |            |   |                  |       |
|----------------------------|-----|---------------------|------------|---|------------------|-------|
| PRC1_BMI_UP.V1_UP          | 168 | -<br>0.4556695<br>8 | -1.8787928 | 0 | 0.0067874<br>98  | 0.076 |
| ALK_DN.V1_UP               | 131 | -<br>0.4485801<br>5 | -1.862391  | 0 | 0.0068153<br>017 | 0.089 |
| NOTCH_DN.V1_UP             | 169 | -<br>0.4447054<br>3 | -1.8454466 | 0 | 0.0078503<br>02  | 0.114 |
| RAPA_EARLY_UP.V1_UP        | 153 | -<br>0.4391221<br>7 | -1.8330141 | 0 | 0.0085852<br>37  | 0.134 |
| ATF2_S_UP.V1_UP            | 177 | -0.4099953          | -1.8184426 | 0 | 0.0089427<br>04  | 0.147 |
| PKCA_DN.V1_DN              | 146 | -<br>0.4258873<br>8 | -1.812706  | 0 | 0.0089724<br>48  | 0.154 |
| MTOR_UP.N4.V1_DN           | 154 | -0.5231579          | -1.8121986 | 0 | 0.0089766<br>97  | 0.157 |
| STK33_SKM_DN               | 235 | -<br>0.4308254<br>4 | -1.8206153 | 0 | 0.0090484<br>03  | 0.147 |
| PIGF_UP.V1_DN              | 178 | -<br>0.4418476<br>8 | -1.8210858 | 0 | 0.0092037<br>77  | 0.146 |
| GCNP_SHH_UP_EARLY.V1_DN    | 157 | -0.4275579          | -1.7971119 | 0 | 0.0094209<br>695 | 0.174 |
| ESC_V6.5_UP_EARLY.V1_UP    | 153 | -0.4347706          | -1.7997797 | 0 | 0.0094393<br>45  | 0.174 |
| ESC_V6.5_UP_LATE.V1_UP     | 170 | -0.4712934          | -1.800405  | 0 | 0.0095204<br>94  | 0.173 |
| CAHOY_OLIGODENDRO<br>CUTIC | 85  | -0.4540185          | -1.7867582 | 0 | 0.0098487<br>38  | 0.183 |
| CRX_DN.V1_UP               | 125 | -<br>0.4185486<br>7 | -1.7739898 | 0 | 0.0102780<br>94  | 0.204 |
| PRC2_EED_UP.V1_UP          | 174 | -<br>0.4293600<br>6 | -1.7749729 | 0 | 0.0104913<br>1   | 0.201 |
| PDGF_UP.V1_DN              | 117 | -<br>0.4557432<br>8 | -1.7648411 | 0 | 0.0111190<br>64  | 0.214 |
| JAK2_DN.V1_UP              | 170 | -0.4131979          | -1.74807   | 0 | 0.0118345<br>14  | 0.238 |
| NRL_DN.V1_DN               | 121 | -0.4069717          | -1.7369152 | 0 | 0.0127949<br>22  | 0.252 |
| STK33_DN                   | 237 | -0.3901516          | -1.7097195 | 0 | 0.0152777<br>04  | 0.306 |
| CRX_NRL_DN.V1_UP           | 129 | -0.4063586          | -1.7099057 | 0 | 0.0154621<br>78  | 0.306 |
| ESC_J1_UP_EARLY.V1_UP      | 151 | -<br>0.3971042<br>3 | -1.6955601 | 0 | 0.0174772<br>5   | 0.33  |

|                           |     |                     |            |                  |                  |       |
|---------------------------|-----|---------------------|------------|------------------|------------------|-------|
| PRC1_BMI_UP.V1_DN         | 171 | -<br>0.3952423<br>3 | -1.6849236 | 0                | 0.0182382<br>11  | 0.34  |
| PRC2_SUZ12_UP.V1_UP       | 172 | -<br>0.4196659<br>6 | -1.781849  | 0.0019305<br>019 | 0.0099062<br>64  | 0.188 |
| GCNP_SHH_UP_LATE.V1_DN    | 168 | -0.3615609          | -1.603944  | 0.0019801<br>98  | 0.0326330<br>55  | 0.504 |
| ATM_DN.V1_UP              | 140 | -0.4430142          | -1.821271  | 0.0019920<br>32  | 0.0094229<br>14  | 0.146 |
| CAHOY_ASTROCYTIC          | 97  | -<br>0.4490713<br>8 | -1.7352251 | 0.002            | 0.0128575<br>92  | 0.256 |
| MTOR_UP.V1_DN             | 170 | -0.4528975          | -1.843926  | 0.0020161<br>29  | 0.0076325<br>005 | 0.116 |
| KRAS.LUNG.BREAST_UP.V1_DN | 132 | -<br>0.4420526<br>3 | -1.714924  | 0.0020161<br>29  | 0.0149397<br>63  | 0.295 |
| LTE2_UP.V1_UP             | 176 | -<br>0.4268371<br>2 | -1.7637072 | 0.0020283<br>975 | 0.0110000<br>88  | 0.215 |
| AKT_UP.V1_DN              | 179 | -<br>0.4774854<br>2 | -1.8606879 | 0.0020325<br>202 | 0.0066007<br>213 | 0.092 |
| WNT_UP.V1_UP              | 169 | -<br>0.3980391<br>6 | -1.7108196 | 0.0020408<br>162 | 0.0156081<br>66  | 0.306 |
| AKT_UP_MTOR_DN.V1_DN      | 177 | -0.3926892          | -1.7162569 | 0.0020618<br>557 | 0.0148129<br>25  | 0.292 |
| P53_DN.V2_UP              | 142 | -0.4796643          | -1.9070125 | 0.0020661<br>156 | 0.0060424<br>78  | 0.059 |
| STK33_NOMO_DN             | 237 | -0.41628            | -1.7516512 | 0.0020661<br>156 | 0.0118378<br>07  | 0.231 |
| YAP1_DN                   | 40  | -<br>0.4751294<br>6 | -1.6658838 | 0.0039062<br>5   | 0.0207450<br>37  | 0.377 |
| ATF2_UP.V1_UP             | 181 | -<br>0.3978132<br>6 | -1.6852853 | 0.0039840<br>64  | 0.0182959<br>87  | 0.339 |
| DCA_UP.V1_DN              | 162 | -<br>0.3854321<br>5 | -1.6451837 | 0.0039840<br>64  | 0.0250376<br>9   | 0.423 |
| P53_DN.V1_DN              | 186 | -<br>0.4907344<br>6 | -1.8404187 | 0.004            | 0.0077967<br>57  | 0.119 |
| ATM_DN.V1_DN              | 140 | -<br>0.4435315<br>7 | -1.7871188 | 0.004            | 0.0099375<br>15  | 0.181 |
| KRAS.LUNG_UP.V1_UP        | 130 | -<br>0.4469970<br>8 | -1.7470609 | 0.004            | 0.0117216<br>58  | 0.238 |
| ALK_DN.V1_DN              | 128 | -0.4361652          | -1.7480787 | 0.004            | 0.0120111<br>49  | 0.238 |
| KRAS.300_UP.V1_UP         | 136 | -0.5224938          | -1.9025966 | 0.0040567<br>95  | 0.0059404<br>033 | 0.061 |

|                      |     |                     |            |                  |                 |       |
|----------------------|-----|---------------------|------------|------------------|-----------------|-------|
| KRAS.KIDNEY_UP.V1_UP | 136 | -0.5694077          | -1.8627278 | 0.0040567<br>95  | 0.0069631<br>99 | 0.088 |
| CTIP_DN.V1_DN        | 118 | -0.4513732          | -1.8069801 | 0.0040650<br>405 | 0.0090116<br>36 | 0.163 |
| RELA_DN.V1_DN        | 127 | -<br>0.4636906<br>7 | -1.8220394 | 0.0040650<br>405 | 0.0095281<br>49 | 0.145 |
| IL21_UP.V1_UP        | 172 | -<br>0.4265453<br>5 | -1.7337606 | 0.0041322<br>31  | 0.0127724<br>53 | 0.256 |
| WNT_UP.V1_DN         | 163 | -<br>0.4234851<br>3 | -1.7570467 | 0.0041493<br>78  | 0.0114248<br>5  | 0.225 |
| SNF5_DN.V1_UP        | 158 | -<br>0.4983180<br>2 | -1.8134499 | 0.0041580<br>04  | 0.0090950<br>88 | 0.153 |
| BCAT.100_UP.V1_UP    | 46  | -<br>0.4880093<br>3 | -1.6691583 | 0.0042918<br>455 | 0.0205770<br>64 | 0.374 |
| NRL_DN.V1_UP         | 129 | -<br>0.3835801<br>8 | -1.603741  | 0.0058252<br>425 | 0.0323077<br>48 | 0.504 |
| PTEN_DN.V2_DN        | 125 | -<br>0.3951398<br>7 | -1.6186128 | 0.0059405<br>942 | 0.0294070<br>2  | 0.469 |
| KRAS.KIDNEY_UP.V1_DN | 126 | -0.4665823          | -1.8453215 | 0.0059880<br>24  | 0.0076322<br>39 | 0.114 |
| E2F1_UP.V1_DN        | 174 | -0.4417965          | -1.7285908 | 0.0061349<br>69  | 0.0131946<br>51 | 0.264 |
| KRAS.BREAST_UP.V1_UP | 128 | -<br>0.4743098<br>6 | -1.8105708 | 0.0062240<br>665 | 0.0090029<br>86 | 0.159 |
| CAHOY_ASTROGLIAL     | 92  | -0.5051626          | -1.7940445 | 0.0062630<br>48  | 0.0096181<br>42 | 0.176 |
| LEF1_UP.V1_UP        | 186 | -<br>0.4940197<br>8 | -1.8104372 | 0.0062893<br>08  | 0.0088648<br>3  | 0.16  |
| VEGF_A_UP.V1_UP      | 185 | -0.4793994          | -1.8289244 | 0.0078895<br>46  | 0.0088734<br>96 | 0.137 |
| PTEN_DN.V2_UP        | 129 | -<br>0.4309052<br>5 | -1.6312122 | 0.0103305<br>78  | 0.0268991<br>92 | 0.449 |
| CRX_DN.V1_DN         | 128 | -0.3943917          | -1.5623249 | 0.0104602<br>51  | 0.0409993<br>38 | 0.581 |
| KRAS.50_UP.V1_UP     | 47  | -0.557791           | -1.7746135 | 0.0105042<br>02  | 0.0103380<br>56 | 0.201 |
| KRAS.600_UP.V1_DN    | 264 | -0.413695           | -1.6921346 | 0.0119521<br>92  | 0.0177759<br>51 | 0.335 |
| CYCLIN_D1_UP.V1_DN   | 179 | -<br>0.3625586<br>6 | -1.5663463 | 0.0121703<br>86  | 0.0401359<br>87 | 0.576 |
| E2F3_UP.V1_UP        | 171 | -<br>0.4459795<br>4 | -1.6856071 | 0.0134357<br>01  | 0.0184487<br>57 | 0.339 |

|                        |     |                     |            |                 |                  |       |
|------------------------|-----|---------------------|------------|-----------------|------------------|-------|
| ERBB2_UP.V1_UP         | 179 | -<br>0.4132729<br>5 | -1.6339794 | 0.0138888<br>89 | 0.0267401<br>82  | 0.441 |
| ESC_J1_UP_LATE.V1_UP   | 175 | -<br>0.4385607<br>2 | -1.6900861 | 0.0141987<br>83 | 0.0179455<br>76  | 0.337 |
| EGFR_UP.V1_DN          | 166 | -<br>0.3833370<br>2 | -1.5711657 | 0.0160320<br>64 | 0.0393627<br>43  | 0.568 |
| LEF1_UP.V1_DN          | 177 | -<br>0.3924903<br>6 | -1.5994887 | 0.0160965<br>79 | 0.0330168<br>57  | 0.515 |
| TGFB_UP.V1_DN          | 179 | -<br>0.3465488<br>6 | -1.496096  | 0.0163599<br>18 | 0.0587686<br>37  | 0.694 |
| IL15_UP.V1_UP          | 171 | -<br>0.3697301<br>7 | -1.5903349 | 0.0181086<br>51 | 0.0349560<br>86  | 0.535 |
| PDGF_ERK_DN.V1_UP      | 132 | -<br>0.3149544<br>3 | -1.4084008 | 0.0184049<br>08 | 0.0912412<br>26  | 0.83  |
| KRAS.PROSTATE_UP.V1_DN | 135 | -0.4369884          | -1.6348603 | 0.0187891<br>44 | 0.0268607<br>85  | 0.441 |
| RPS14_DN.V1_UP         | 184 | -0.5615499          | -1.7861389 | 0.0205761<br>32 | 0.0097207<br>865 | 0.183 |
| RAPA_EARLY_UP.V1_DN    | 173 | -0.3509905          | -1.5225507 | 0.0210325<br>05 | 0.0504562<br>33  | 0.668 |
| SRC_UP.V1_UP           | 148 | -<br>0.4106425<br>3 | -1.5412781 | 0.0216535<br>44 | 0.0463671<br>65  | 0.631 |
| CSR_EARLY_UP.V1_DN     | 111 | -0.4124138          | -1.5780567 | 0.0230326<br>3  | 0.0377973<br>73  | 0.556 |
| RAF_UP.V1_DN           | 177 | -<br>0.4099345<br>2 | -1.5448812 | 0.0261569<br>41 | 0.0457649<br>12  | 0.624 |
| CAHOY_NEURONAL         | 94  | -0.4488035          | -1.6332852 | 0.0275590<br>55 | 0.0265922<br>1   | 0.442 |
| RELA_DN.V1_UP          | 145 | -0.3550513          | -1.4845804 | 0.0278884<br>47 | 0.0624891<br>3   | 0.712 |
| NFE2L2.V2              | 411 | -<br>0.3621511<br>5 | -1.5801932 | 0.0293542<br>07 | 0.0374653<br>8   | 0.55  |
| BCAT_GDS748_UP         | 46  | -<br>0.4427966<br>5 | -1.5236131 | 0.0325203<br>24 | 0.0505429        | 0.663 |
| PKCA_DN.V1_UP          | 150 | -<br>0.3561986<br>4 | -1.5045141 | 0.0325203<br>24 | 0.0564100<br>78  | 0.688 |
| IL2_UP.V1_UP           | 173 | -<br>0.3828537<br>8 | -1.5565723 | 0.0330578<br>5  | 0.0427576<br>68  | 0.596 |
| KRAS.300_UP.V1_DN      | 131 | -<br>0.3958276<br>5 | -1.537856  | 0.0354330<br>73 | 0.0461647<br>36  | 0.64  |

|                                        |      |                     |            |                  |                 |            |
|----------------------------------------|------|---------------------|------------|------------------|-----------------|------------|
| RB_P130_DN.V1_UP                       | 116  | -<br>0.4175897<br>5 | -1.5385842 | 0.0390143<br>73  | 0.0467800<br>35 | 0.639      |
| CYCLIN_D1_UP.V1_UP                     | 178  | -0.332474           | -1.413482  | 0.0462776<br>65  | 0.0895022<br>9  | 0.821      |
| KRAS.LUNG.BREAST_UP.<br>V1_UP          | 135  | -<br>0.4054509<br>7 | -1.5378803 | 0.0476190<br>5   | 0.0465921<br>87 | 0.64       |
| SRC_UP.V1_DN                           | 152  | -<br>0.3073923<br>6 | -1.3628328 | 0.0483870<br>95  | 0.1134706<br>2  | 0.886      |
| KRAS.DF.V1_DN                          | 183  | -<br>0.3338904<br>7 | -1.3887444 | 0.0499002        | 0.0997421<br>15 | 0.848      |
| HOXA9_DN.V1_UP                         | 171  | -<br>0.4506379<br>7 | -1.5686555 | 0.05             | 0.0396810<br>17 | 0.571      |
| <b>ZNF426 LOW</b>                      |      |                     |            |                  |                 |            |
| <b>HALLMARK</b>                        |      |                     |            |                  |                 |            |
| Process                                | SIZE | ES                  | NES        | NOM p-val        | FDR q-val       | FWER p-val |
| HALLMARK_DNA_REPAIR                    | 140  | 0.5191116           | 1.8323119  | 0.0120481<br>92  | 0.0723354<br>2  | 0.125      |
| HALLMARK_OXIDATIVE<br>_PHOSPHORYLATION | 182  | 0.6202922           | 1.8700818  | 0.0141414<br>14  | 0.0921936<br>1  | 0.089      |
| <b>ONCOGENIC</b>                       |      |                     |            |                  |                 |            |
| Process                                | SIZE | ES                  | NES        | NOM p-val        | FDR q-val       | FWER p-val |
| CAMP_UP.V1_UP                          | 180  | 0.4031805<br>7      | 1.7084215  | 0.0019157<br>088 | 0.1711983<br>5  | 0.302      |
| <b>ZNF426 HIGH</b>                     |      |                     |            |                  |                 |            |
| <b>HALLMARK</b>                        |      |                     |            |                  |                 |            |
| Process                                | SIZE | ES                  | NES        | NOM p-val        | FDR q-val       | FWER p-val |
| HALLMARK_TGF_BETA_<br>SIGNALING        | 54   | -<br>0.6055429<br>6 | -1.8469702 | 0.0041493<br>78  | 0.1681964<br>2  | 0.092      |
| HALLMARK_PROTEIN_S<br>ECRETION         | 95   | -0.5346111          | -1.7968848 | 0.0060851<br>93  | 0.1318925<br>8  | 0.138      |
| HALLMARK_UV_RESPO<br>NSE_DN            | 137  | -0.5330411          | -1.7297308 | 0.0085106<br>38  | 0.1195591<br>7  | 0.225      |
| HALLMARK_ANDROGE<br>N_RESPONSE         | 96   | -<br>0.4759889<br>5 | -1.7401007 | 0.0101214<br>57  | 0.1433816       | 0.212      |
| HALLMARK_ESTROGEN_<br>RESPONSE_EARLY   | 192  | -0.4221948          | -1.6895446 | 0.0143737<br>17  | 0.1272883<br>4  | 0.281      |
| <b>ONCOGENIC</b>                       |      |                     |            |                  |                 |            |
| Process                                | SIZE | ES                  | NES        | NOM p-val        | FDR q-val       | FWER p-val |
| TBK1.DF_DN                             | 257  | -<br>0.5727204<br>7 | -1.9589195 | 0                | 0.0135269<br>73 | 0.027      |
| EIF4E_DN                               | 90   | -0.6262681          | -2.0373917 | 0                | 0.0147034<br>09 | 0.011      |

|                                 |      |                     |            |                  |                 |            |
|---------------------------------|------|---------------------|------------|------------------|-----------------|------------|
| PIGF_UP.V1_UP                   | 177  | -<br>0.5848549<br>6 | -1.9663792 | 0.0039920<br>16  | 0.0177753<br>98 | 0.023      |
| <b>ZNF540 LOW</b>               |      |                     |            |                  |                 |            |
| <b>HALLMARK</b>                 |      |                     |            |                  |                 |            |
| Process                         | SIZE | ES                  | NES        | NOM p-val        | FDR q-val       | FWER p-val |
| No process                      |      |                     |            | -                |                 |            |
| <b>ONCOGENIC</b>                |      |                     |            |                  |                 |            |
| Process                         | SIZE | ES                  | NES        | NOM p-val        | FDR q-val       | FWER p-val |
| CSR_EARLY_UP.V1_UP              | 136  | 0.5592234           | 1.8651284  | 0.0038387<br>715 | 0.0682257<br>6  | 0.091      |
| SINGH_KRAS_DEPENDENCY_SIGNATURE | 20   | 0.7738371<br>5      | 1.7358071  | 0.0273437<br>5   | 0.1337076<br>6  | 0.248      |
| <b>ZNF540 HIGH</b>              |      |                     |            |                  |                 |            |
| <b>HALLMARK</b>                 |      |                     |            |                  |                 |            |
| Process                         | SIZE | ES                  | NES        | NOM p-val        | FDR q-val       | FWER p-val |
| No process                      |      |                     |            | -                |                 |            |
| <b>ONCOGENIC</b>                |      |                     |            |                  |                 |            |
| Process                         | SIZE | ES                  | NES        | NOM p-val        | FDR q-val       | FWER p-val |
| KRAS.BREAST_UP.V1_DN            | 129  | -<br>0.4814613<br>2 | -1.7783498 | 0                | 0.0944923<br>3  | 0.185      |
| KRAS.PROSTATE_UP.V1_UP          | 126  | -<br>0.4769507<br>6 | -1.8134872 | 0                | 0.1069939<br>7  | 0.147      |
| PRC2_SUZ12_UP.V1_DN             | 169  | -<br>0.4020540<br>7 | -1.7224718 | 0                | 0.1135172<br>55 | 0.274      |
| IL2_UP.V1_DN                    | 172  | -<br>0.4830475<br>2 | -1.8390303 | 0                | 0.1159102<br>25 | 0.117      |
| CTIP_DN.V1_UP                   | 120  | -<br>0.5135624<br>4 | -1.8974354 | 0.0020283<br>975 | 0.1073156<br>3  | 0.064      |
| KRAS.AMP.LUNG_UP.V1_DN          | 126  | -0.4467045          | -1.7455815 | 0.0038167<br>94  | 0.1149683<br>4  | 0.231      |
| MTOR_UP.N4.V1_DN                | 154  | -0.512408           | -1.7972623 | 0.0041152<br>26  | 0.0960128<br>1  | 0.166      |
| CRX_DN.V1_UP                    | 125  | -<br>0.3750447<br>6 | -1.6064051 | 0.0057471<br>264 | 0.1434885<br>1  | 0.485      |
| DCA_UP.V1_DN                    | 162  | -<br>0.3592804<br>7 | -1.5646865 | 0.0059055<br>12  | 0.109942        | 0.574      |
| KRAS.AMP.LUNG_UP.V1_UP          | 130  | -<br>0.4562855<br>4 | -1.6898639 | 0.0059523<br>81  | 0.1108542<br>1  | 0.319      |
| BRCA1_DN.V1_UP                  | 122  | -<br>0.4723107<br>8 | -1.7444317 | 0.0061349<br>69  | 0.0997546<br>3  | 0.231      |



|                               |     |                     |            |                  |                 |       |
|-------------------------------|-----|---------------------|------------|------------------|-----------------|-------|
| IL15_UP.V1_DN                 | 164 | -<br>0.4375225<br>6 | -1.6933297 | 0.0061983<br>47  | 0.1178577<br>24 | 0.312 |
| P53_DN.V2_DN                  | 141 | -<br>0.3883070<br>6 | -1.636611  | 0.0062761<br>507 | 0.1571774<br>8  | 0.423 |
| ATF2_S_UP.V1_UP               | 177 | -0.3585978          | -1.5911301 | 0.0079840<br>32  | 0.1387612<br>1  | 0.515 |
| BMI1_DN.MEL18_DN.V1_DN        | 137 | -<br>0.4618326<br>7 | -1.7192783 | 0.0081799<br>59  | 0.1036663<br>9  | 0.279 |
| STK33_DN                      | 237 | -<br>0.3630344<br>3 | -1.6009351 | 0.0081799<br>59  | 0.1347217<br>3  | 0.493 |
| PTEN_DN.V1_UP                 | 168 | -<br>0.4036195<br>3 | -1.5676091 | 0.0102459<br>015 | 0.1148764<br>5  | 0.566 |
| BRCA1_DN.V1_DN                | 123 | -0.3892924          | -1.6127898 | 0.0102880<br>66  | 0.1547033<br>6  | 0.473 |
| PRC1_BMI_UP.V1_DN             | 171 | -0.3623015          | -1.5305016 | 0.0119284<br>3   | 0.1232848<br>6  | 0.648 |
| KRAS.600.LUNG.BREAST_UP.V1_DN | 265 | -<br>0.3946220<br>3 | -1.6206548 | 0.012            | 0.1523793       | 0.454 |
| IL21_UP.V1_DN                 | 166 | -<br>0.3994833<br>8 | -1.6069379 | 0.014            | 0.1512433<br>1  | 0.482 |
| PRC2_SUZ12_UP.V1_UP           | 172 | -<br>0.3681104<br>8 | -1.5815599 | 0.0140280<br>565 | 0.1293786<br>9  | 0.527 |
| ESC_V6.5_UP_EARLY.V1_UP       | 153 | -<br>0.3616122<br>6 | -1.5080565 | 0.0159045<br>72  | 0.1250300<br>7  | 0.688 |
| CSR_EARLY_UP.V1_DN            | 111 | -0.4237799          | -1.6317422 | 0.0164609<br>05  | 0.1518801<br>9  | 0.435 |
| STK33_SKM_DN                  | 235 | -0.3678678          | -1.5844793 | 0.0166320<br>17  | 0.1327713<br>7  | 0.526 |
| SRC_UP.V1_UP                  | 148 | -<br>0.4201329<br>4 | -1.5690321 | 0.0176125<br>24  | 0.1220587<br>3  | 0.562 |
| CRX_NRL_DN.V1_UP              | 129 | -<br>0.3711030<br>2 | -1.5689805 | 0.0179640<br>73  | 0.1177792<br>85 | 0.562 |
| NOTCH_DN.V1_DN                | 170 | -<br>0.3899374<br>6 | -1.5779254 | 0.0183299<br>39  | 0.1223932<br>65 | 0.534 |
| JAK2_DN.V1_UP                 | 170 | -<br>0.3624685<br>4 | -1.4954052 | 0.0197238<br>66  | 0.1306938<br>1  | 0.713 |
| MTOR_UP.V1_DN                 | 170 | -<br>0.3913824<br>3 | -1.6027552 | 0.0205338<br>8   | 0.1389874<br>8  | 0.488 |
| JNK_DN.V1_UP                  | 170 | -<br>0.4009769<br>3 | -1.5703297 | 0.0206185<br>56  | 0.1251537<br>7  | 0.557 |

|                               |      |           |            |               |                  |                 |       |
|-------------------------------|------|-----------|------------|---------------|------------------|-----------------|-------|
| STK33_NOMO_DN                 | 237  | -         | 0.3633149  | -1.5206835    | 0.0228215<br>77  | 0.1278755       | 0.668 |
| E2F3_UP.V1_UP                 | 171  | -         | -0.4123802 | -1.5503093    | 0.0271844<br>66  | 0.1110032<br>6  | 0.608 |
| LEF1_UP.V1_DN                 | 177  | -         | -0.3852115 | -1.5596665    | 0.0283975<br>66  | 0.1102901<br>55 | 0.581 |
| PRC1_BMI_UP.V1_UP             | 168  | -         | -0.361633  | -1.4804169    | 0.0283975<br>66  | 0.1334447<br>9  | 0.738 |
| BMI1_DN.V1_DN                 | 128  | -         | -0.4102482 | -1.5902628    | 0.0289256<br>2   | 0.1330046<br>8  | 0.516 |
| CAHOY_OLIGODENDRO<br>CUTIC    | 85   | -         | 0.3670738  | -1.4753858    | 0.0304259<br>64  | 0.1319194<br>9  | 0.743 |
| RAPA_EARLY_UP.V1_UP           | 153  | -         | 0.3568580  | -1.4766347    | 0.0316831<br>7   | 0.1337290<br>1  | 0.742 |
| P53_DN.V2_UP                  | 142  | -         | 0.3935677  | -1.5785142    | 0.0322580<br>64  | 0.1271423<br>5  | 0.534 |
| PTEN_DN.V1_DN                 | 167  | -         | -0.3780826 | -1.5146405    | 0.0356435<br>63  | 0.1257368<br>6  | 0.679 |
| ATM_DN.V1_UP                  | 140  | -         | -0.3551041 | -1.4652463    | 0.0362903<br>2   | 0.1348755<br>8  | 0.759 |
| DCA_UP.V1_UP                  | 166  | -         | 0.3299048  | -1.4171975    | 0.0363636<br>35  | 0.1565429       | 0.82  |
| ALK_DN.V1_DN                  | 128  | -         | 0.3735321  | -1.482125     | 0.0368932<br>04  | 0.1349897<br>4  | 0.735 |
| KRAS.LUNG.BREAST_UP.<br>V1_DN | 132  | -         | 0.3781921  | -1.4714079    | 0.0398406<br>4   | 0.1323610<br>7  | 0.748 |
| PIGF_UP.V1_DN                 | 178  | -         | 0.3652449  | -1.4974983    | 0.0417495<br>03  | 0.1313449<br>3  | 0.708 |
| GCNP_SHH_UP_EARLY.V<br>1_DN   | 157  | -         | 0.3449003  | -1.436735     | 0.0443037<br>97  | 0.1480858       | 0.803 |
| KRAS.300_UP.V1_DN             | 131  | -         | 0.3874197  | -1.483671     | 0.0454545<br>47  | 0.13633         | 0.73  |
| JNK_DN.V1_DN                  | 174  | -         | 0.3863625  | -1.5199273    | 0.0473251<br>04  | 0.1249660<br>5  | 0.67  |
| ZNF880 LOW                    |      |           |            |               |                  |                 |       |
| HALLMARK                      |      |           |            |               |                  |                 |       |
| Process                       | SIZE | ES        | NES        | NOM p-<br>val | FDR q-val        | FWER p-<br>val  |       |
| HALLMARK_MYC_TARG<br>ETS_V1   | 188  | 0.7553346 | 2.1108708  | 0             | 0.0019721<br>505 | 0.005           |       |
| ONCOGENIC                     |      |           |            |               |                  |                 |       |
| Process                       | SIZE | ES        | NES        | NOM p-<br>val | FDR q-val        | FWER p-<br>val  |       |

| SINGH_KRAS_DEPENDENCY_SIGNATURE            | 20   | 0.7726228       | 1.7392375  | 0.022132797  | 0.0793264    | 0.25       |
|--------------------------------------------|------|-----------------|------------|--------------|--------------|------------|
| <b>ZNF880 HIGH</b>                         |      |                 |            |              |              |            |
| <b>HALLMARK</b>                            |      |                 |            |              |              |            |
| Process                                    | SIZE | ES              | NES        | NOM p-val    | FDR q-val    | FWER p-val |
| HALLMARK_KRAS_SIGNALLING_UP                | 193  | -<br>0.53431296 | -1.8807771 | 0.0019417476 | 0.13277923   | 0.073      |
| HALLMARK_IL2_STAT5_SIGNALING               | 194  | -0.492885       | -1.8228027 | 0.008016032  | 0.08579951   | 0.128      |
| HALLMARK_COAGULATION                       | 136  | -<br>0.50367165 | -1.8331504 | 0.009505703  | 0.11030985   | 0.114      |
| HALLMARK_WNT_BETA_CATENIN_SIGNALING        | 42   | -<br>0.48259205 | -1.6514124 | 0.017578125  | 0.19889294   | 0.353      |
| HALLMARK_KRAS_SIGNALLING_DN                | 188  | -0.3903482      | -1.6159383 | 0.02053388   | 0.15808839   | 0.408      |
| HALLMARK_APICAL_SURFACE                    | 43   | -<br>0.43622726 | -1.5511712 | 0.022680413  | 0.18224429   | 0.515      |
| HALLMARK_UV_RESPONSE_DN                    | 137  | -<br>0.50507885 | -1.6149762 | 0.032945737  | 0.14073399   | 0.408      |
| HALLMARK_BILE_ACID_METABOLISM              | 112  | -0.3690332      | -1.4684645 | 0.036659878  | 0.20230177   | 0.674      |
| HALLMARK_EPITHELIAL_MESENCHYMAL_TRANSITION | 194  | -0.6100307      | -1.671884  | 0.047244094  | 0.21426366   | 0.324      |
| <b>ONCOGENIC</b>                           |      |                 |            |              |              |            |
| Process                                    | SIZE | ES              | NES        | NOM p-val    | FDR q-val    | FWER p-val |
| BRCA1_DN.V1_UP                             | 122  | -0.5570718      | -2.0580592 | 0            | 0.0020800577 | 0.006      |
| JNK_DN.V1_UP                               | 170  | -0.5336213      | -2.1285303 | 0            | 0.002087807  | 0.002      |
| IL21_UP.V1_DN                              | 166  | -<br>0.51926875 | -2.0645976 | 0            | 0.0023379507 | 0.005      |
| KRAS.600_UP.V1_UP                          | 261  | -0.5205863      | -1.966695  | 0            | 0.0026885504 | 0.019      |
| KRAS.PROSTATE_UP.V1_UP                     | 126  | -<br>0.56847614 | -2.0996742 | 0            | 0.0027082842 | 0.004      |
| BMI1_DN.V1_DN                              | 128  | -<br>0.50684017 | -1.9754233 | 0            | 0.0027929503 | 0.019      |
| JNK_DN.V1_DN                               | 174  | -0.4984375      | -1.976734  | 0            | 0.0030077924 | 0.019      |
| PTEN_DN.V1_UP                              | 168  | -<br>0.50598216 | -1.9572101 | 0            | 0.0031016576 | 0.024      |
| KRAS.KIDNEY_UP.V1_UP                       | 136  | -0.5996813      | -1.958878  | 0            | 0.0031779842 | 0.023      |

|                                   |     |                     |            |   |                  |       |
|-----------------------------------|-----|---------------------|------------|---|------------------|-------|
| P53_DN.V1_DN                      | 186 | -<br>0.5336485<br>5 | -1.9778731 | 0 | 0.0032584<br>418 | 0.019 |
| IL15_UP.V1_DN                     | 164 | -<br>0.5101144<br>3 | -2.0009875 | 0 | 0.0035245<br>91  | 0.018 |
| MEL18_DN.V1_DN                    | 137 | -0.5422305          | -1.9807446 | 0 | 0.0035546<br>639 | 0.019 |
| CYCLIN_D1_KE_.V1_DN               | 184 | -0.4780042          | -1.982091  | 0 | 0.0039101<br>304 | 0.019 |
| BMI1_DN_MEL18_DN.V1_DN            | 137 | -0.5401704          | -2.0023165 | 0 | 0.0039651<br>645 | 0.018 |
| NOTCH_DN.V1_DN                    | 170 | -<br>0.5313173<br>5 | -2.142779  | 0 | 0.0041756<br>14  | 0.002 |
| ATF2_UP.V1_DN                     | 170 | -0.5211129          | -1.9302804 | 0 | 0.0042912<br>527 | 0.035 |
| KRAS.300_UP.V1_UP                 | 136 | -<br>0.5279162<br>5 | -1.9322002 | 0 | 0.0044714<br>063 | 0.035 |
| ATF2_S_UP.V1_DN                   | 176 | -0.5439721          | -2.003248  | 0 | 0.0045316<br>17  | 0.018 |
| STK33_SKM_DN                      | 235 | -<br>0.4520553<br>4 | -1.9254154 | 0 | 0.0045759<br>07  | 0.038 |
| CTIP_DN.V1_UP                     | 120 | -0.5206223          | -1.9216428 | 0 | 0.0046287<br>04  | 0.04  |
| IL2_UP.V1_DN                      | 172 | -<br>0.5404334<br>7 | -2.009067  | 0 | 0.0050823<br>945 | 0.018 |
| LTE2_UP.V1_UP                     | 176 | -<br>0.4589202<br>7 | -1.89521   | 0 | 0.0055797<br>915 | 0.048 |
| MTOR_UP.N4.V1_DN                  | 154 | -<br>0.5356571<br>7 | -1.8682472 | 0 | 0.0056409<br>477 | 0.069 |
| P53_DN.V2_DN                      | 141 | -<br>0.4460598<br>8 | -1.8683933 | 0 | 0.0057789<br>14  | 0.069 |
| BRCA1_DN.V1_DN                    | 123 | -<br>0.4636072<br>2 | -1.8856051 | 0 | 0.0058287<br>18  | 0.059 |
| KRAS.50_UP.V1_UP                  | 47  | -<br>0.5894888<br>6 | -1.8632555 | 0 | 0.0058599<br>375 | 0.076 |
| CAHOY_OLIGODENDRO<br>CUTIC        | 85  | -0.4713739          | -1.8782787 | 0 | 0.0059171<br>855 | 0.064 |
| ATM_DN.V1_DN                      | 140 | -<br>0.4626047<br>3 | -1.8887779 | 0 | 0.0060668<br>77  | 0.056 |
| VEGF_A_UP.V1_UP                   | 185 | -0.5057899          | -1.8879248 | 0 | 0.0061673<br>37  | 0.057 |
| KRAS.600.LUNG.BREAST_<br>UP.V1_DN | 265 | -<br>0.4476342<br>5 | -1.8423011 | 0 | 0.0062971<br>28  | 0.094 |

|                               |     |                     |            |                  |                  |       |
|-------------------------------|-----|---------------------|------------|------------------|------------------|-------|
| PRC1_BMI_UP.V1_UP             | 168 | -0.4602045          | -1.890119  | 0                | 0.0063196<br>64  | 0.056 |
| JAK2_DN.V1_UP                 | 170 | -<br>0.4413165<br>5 | -1.8521793 | 0                | 0.0063638<br>673 | 0.087 |
| ESC_V6.5_UP_EARLY.V1_UP       | 153 | -<br>0.4383237<br>7 | -1.8425586 | 0                | 0.0064076<br>055 | 0.094 |
| MTOR_UP.V1_DN                 | 170 | -<br>0.4605473<br>3 | -1.844177  | 0                | 0.0065484<br>666 | 0.094 |
| AKT_UP.V1_DN                  | 179 | -<br>0.4779144<br>2 | -1.8311363 | 0                | 0.0069455<br>355 | 0.107 |
| PKCA_DN.V1_DN                 | 146 | -0.4262535          | -1.826998  | 0                | 0.0069882<br>134 | 0.11  |
| PRC2_SUZ12_UP.V1_DN           | 169 | -<br>0.4322900<br>5 | -1.8212489 | 0                | 0.0076670<br>74  | 0.122 |
| GCNP_SHH_UP_EARLY.V1_DN       | 157 | -<br>0.4346948<br>6 | -1.8087583 | 0                | 0.0081803<br>28  | 0.137 |
| KRAS.AMP.LUNG_UP.V1_DN        | 126 | -<br>0.4673130<br>2 | -1.7980953 | 0                | 0.0085180<br>355 | 0.147 |
| KRAS.AMP.LUNG_UP.V1_UP        | 130 | -<br>0.4840309<br>3 | -1.7991425 | 0                | 0.0086548<br>03  | 0.147 |
| RAPA_EARLY_UP.V1_UP           | 153 | -<br>0.4360724<br>7 | -1.7919617 | 0                | 0.0090059<br>6   | 0.157 |
| PRC2_EED_UP.V1_UP             | 174 | -<br>0.4247905<br>6 | -1.7809367 | 0                | 0.0090641<br>69  | 0.177 |
| KRAS.BREAST_UP.V1_DN          | 129 | -<br>0.4875043<br>6 | -1.7870405 | 0                | 0.0090923<br>69  | 0.168 |
| CAHOY_ASTROCYTIC              | 97  | -<br>0.4509476<br>4 | -1.7721968 | 0                | 0.0095814<br>84  | 0.19  |
| CYCLIN_D1_UP.V1_DN            | 179 | -0.3866293          | -1.6980233 | 0                | 0.0172555<br>28  | 0.326 |
| ATF2_S_UP.V1_UP               | 177 | -0.3779935          | -1.6573681 | 0                | 0.0228551<br>76  | 0.405 |
| KRAS.600.LUNG.BREAST_UP.V1_UP | 267 | -<br>0.4416869<br>6 | -1.7998439 | 0.0019157<br>088 | 0.0088107<br>86  | 0.147 |
| AKT_UP_MTOR_DN.V1_DN          | 177 | -<br>0.3756764<br>8 | -1.6380923 | 0.0019379<br>845 | 0.0256490<br>6   | 0.441 |
| ESC_J1_UP_LATE.V1_UP          | 175 | -<br>0.4764093<br>5 | -1.8625531 | 0.0019417<br>476 | 0.0056971<br>614 | 0.076 |
| CTIP_DN.V1_DN                 | 118 | -<br>0.4527053<br>2 | -1.817208  | 0.0019455<br>253 | 0.0076750<br>21  | 0.126 |

|                            |     |                     |            |                  |                  |       |
|----------------------------|-----|---------------------|------------|------------------|------------------|-------|
| KRAS.BREAST_UP.V1_UP       | 128 | -<br>0.4913867<br>4 | -1.8869253 | 0.0019493<br>178 | 0.0059792<br>15  | 0.058 |
| PRC2_SUZ12_UP.V1_UP        | 172 | -0.39345            | -1.6650878 | 0.0019493<br>178 | 0.0215650<br>03  | 0.394 |
| PDGF_UP.V1_DN              | 117 | -<br>0.4465543<br>3 | -1.788049  | 0.0019531<br>25  | 0.0091296<br>95  | 0.166 |
| PTEN_DN.V1_DN              | 167 | -<br>0.4717122<br>3 | -1.872992  | 0.0019607<br>844 | 0.0055950<br>647 | 0.067 |
| ESC_V6.5_UP_LATE.V1_U<br>P | 170 | -<br>0.4787799<br>4 | -1.813443  | 0.0019880<br>715 | 0.0078247<br>13  | 0.128 |
| STK33_NOMO_DN              | 237 | -0.4136329          | -1.7405137 | 0.0019920<br>32  | 0.0124952<br>6   | 0.24  |
| NOTCH_DN.V1_UP             | 169 | -<br>0.4144337<br>5 | -1.7255309 | 0.002            | 0.0138906<br>07  | 0.274 |
| STK33_DN                   | 237 | -<br>0.3918237<br>7 | -1.713288  | 0.0020120<br>724 | 0.0149179<br>7   | 0.288 |
| LEF1_UP.V1_UP              | 186 | -<br>0.5129769<br>4 | -1.8779308 | 0.0020202<br>02  | 0.0057199<br>458 | 0.064 |
| E2F1_UP.V1_DN              | 174 | -<br>0.4214429<br>3 | -1.6897892 | 0.0020202<br>02  | 0.0185179<br>75  | 0.343 |
| DCA_UP.V1_UP               | 166 | -0.4088643          | -1.7393749 | 0.0020283<br>975 | 0.0124191<br>595 | 0.241 |
| KRAS.KIDNEY_UP.V1_DN       | 126 | -<br>0.4476407<br>2 | -1.7195729 | 0.0020491<br>802 | 0.0142843<br>42  | 0.281 |
| RELA_DN.V1_DN              | 127 | -<br>0.4728921<br>4 | -1.8196473 | 0.0020576<br>13  | 0.0076421<br>61  | 0.123 |
| IL21_UP.V1_UP              | 172 | -<br>0.4336121<br>7 | -1.7476187 | 0.0020618<br>557 | 0.0119441<br>98  | 0.231 |
| ATM_DN.V1_UP               | 140 | -0.4321151          | -1.7387314 | 0.0020876<br>827 | 0.0122741<br>84  | 0.242 |
| CAHOY_ASTROGLIAL           | 92  | -0.5239279          | -1.8736614 | 0.0039840<br>64  | 0.0057402<br>295 | 0.067 |
| PTEN_DN.V2_UP              | 129 | -<br>0.4677861<br>6 | -1.7916532 | 0.0040241<br>447 | 0.0088360<br>37  | 0.157 |
| KRAS.PROSTATE_UP.V1_<br>DN | 135 | -<br>0.4753490<br>4 | -1.7864103 | 0.0040241<br>447 | 0.0089549<br>19  | 0.169 |
| LEF1_UP.V1_DN              | 177 | -0.4180833          | -1.6887565 | 0.0040241<br>447 | 0.0182356<br>63  | 0.345 |
| PRC1_BMI_UP.V1_DN          | 171 | -<br>0.3876536<br>2 | -1.6065522 | 0.0040241<br>447 | 0.0306880<br>9   | 0.496 |

|                           |     |                     |            |                  |                 |       |
|---------------------------|-----|---------------------|------------|------------------|-----------------|-------|
| CRX_DN.V1_UP              | 125 | -<br>0.3980547<br>2 | -1.689496  | 0.0040567<br>95  | 0.0183196<br>53 | 0.345 |
| P53_DN.V2_UP              | 142 | -0.452817           | -1.7841852 | 0.0059055<br>12  | 0.0090549<br>73 | 0.174 |
| KRAS.600_UP.V1_DN         | 264 | -0.4198844          | -1.7122804 | 0.0059405<br>942 | 0.0148291<br>57 | 0.291 |
| IL15_UP.V1_UP             | 171 | -<br>0.3692649<br>3 | -1.5682822 | 0.0060120<br>24  | 0.0382637<br>6  | 0.57  |
| ESC_V6.5_UP_EARLY.V1_DN   | 153 | -0.4833999          | -1.803128  | 0.0060362<br>173 | 0.0086085<br>12 | 0.142 |
| WNT_UP.V1_DN              | 163 | -<br>0.4252768<br>8 | -1.7544483 | 0.0060728<br>746 | 0.0112338<br>05 | 0.218 |
| EGFR_UP.V1_DN             | 166 | -0.40838            | -1.6716326 | 0.0060975<br>607 | 0.0207476<br>65 | 0.383 |
| CRX_NRL_DN.V1_UP          | 129 | -0.3736479          | -1.5742764 | 0.0061728<br>396 | 0.0368991       | 0.549 |
| CSR_LATE_UP.V1_DN         | 131 | -<br>0.4584121<br>4 | -1.7828397 | 0.0078277<br>89  | 0.0090724<br>29 | 0.176 |
| GCNP_SHH_UP_LATE.V1_DN    | 168 | -<br>0.3321255<br>7 | -1.4565773 | 0.0098814<br>23  | 0.0661324<br>3  | 0.769 |
| KRAS.LUNG.BREAST_UP.V1_DN | 132 | -0.4208828          | -1.64033   | 0.0099403<br>58  | 0.0254948<br>92 | 0.438 |
| ESC_J1_UP_EARLY.V1_UP     | 151 | -<br>0.3817539<br>5 | -1.6222422 | 0.0099601<br>6   | 0.0278407<br>58 | 0.469 |
| RAF_UP.V1_DN              | 177 | -<br>0.4467896<br>2 | -1.7229601 | 0.0113852        | 0.0142087<br>47 | 0.278 |
| NRL_DN.V1_UP              | 129 | -<br>0.3711713<br>9 | -1.55595   | 0.0116731<br>515 | 0.0400114<br>02 | 0.587 |
| KRAS.LUNG_UP.V1_UP        | 130 | -0.4630544          | -1.7793784 | 0.0119521<br>92  | 0.0090586<br>25 | 0.18  |
| RAPA_EARLY_UP.V1_DN       | 173 | -<br>0.3638496<br>7 | -1.5795484 | 0.0120724<br>35  | 0.0366130<br>17 | 0.544 |
| PKCA_DN.V1_UP             | 150 | -<br>0.3628052<br>5 | -1.5431333 | 0.0121212<br>12  | 0.0419527<br>9  | 0.613 |
| RPS14_DN.V1_UP            | 184 | -0.5755643          | -1.9073397 | 0.0135922<br>33  | 0.0048498<br>15 | 0.042 |
| WNT_UP.V1_UP              | 169 | -<br>0.3715554<br>5 | -1.5699593 | 0.0141700<br>4   | 0.0380317<br>98 | 0.565 |
| SNF5_DN.V1_DN             | 147 | -<br>0.4087349<br>5 | -1.6342388 | 0.0157790<br>93  | 0.0261701<br>08 | 0.448 |
| RELA_DN.V1_UP             | 145 | -<br>0.3713486<br>2 | -1.541634  | 0.0159680<br>64  | 0.0419874<br>97 | 0.617 |

|                               |     |                     |            |                 |                 |       |
|-------------------------------|-----|---------------------|------------|-----------------|-----------------|-------|
| ERBB2_UP.V1_UP                | 179 | -<br>0.4077924<br>5 | -1.6321173 | 0.0179640<br>73 | 0.0263481<br>03 | 0.451 |
| BCAT.100_UP.V1_DN             | 28  | -0.4691471          | -1.5784229 | 0.0179640<br>73 | 0.0364797<br>5  | 0.544 |
| ALK_DN.V1_DN                  | 128 | -<br>0.4031704<br>4 | -1.586379  | 0.0180722<br>88 | 0.0350074<br>5  | 0.525 |
| PTEN_DN.V2_DN                 | 125 | -<br>0.3824116<br>6 | -1.5513586 | 0.0191204<br>59 | 0.0402142<br>44 | 0.594 |
| ATF2_UP.V1_UP                 | 181 | -0.3634727          | -1.5213069 | 0.0198019<br>8  | 0.0458936<br>9  | 0.658 |
| DCA_UP.V1_DN                  | 162 | -<br>0.3369641<br>6 | -1.4625524 | 0.0199600<br>8  | 0.0644632       | 0.754 |
| SNF5_DN.V1_UP                 | 158 | -0.4820875          | -1.7539169 | 0.0207468<br>89 | 0.0110897<br>15 | 0.218 |
| CRX_DN.V1_DN                  | 128 | -<br>0.3721545<br>3 | -1.5050715 | 0.0215686<br>28 | 0.0498792<br>86 | 0.682 |
| ALK_DN.V1_UP                  | 131 | -<br>0.3787124<br>2 | -1.550308  | 0.0219560<br>88 | 0.0400530<br>47 | 0.597 |
| KRAS.300_UP.V1_DN             | 131 | -0.4152209          | -1.5910677 | 0.0221774<br>19 | 0.0341065<br>5  | 0.521 |
| STK33_SKM_UP                  | 238 | -0.4503159          | -1.6263297 | 0.0224489<br>8  | 0.0272794<br>35 | 0.46  |
| HOXA9_DN.V1_UP                | 171 | -<br>0.4852942<br>2 | -1.6817813 | 0.0227743<br>28 | 0.0190992<br>93 | 0.357 |
| E2F3_UP.V1_UP                 | 171 | -<br>0.4181543<br>3 | -1.5769879 | 0.0242537<br>32 | 0.0365063<br>44 | 0.545 |
| RAF_UP.V1_UP                  | 182 | -<br>0.3883815<br>7 | -1.5095226 | 0.026           | 0.0489747<br>9  | 0.678 |
| KRAS.LUNG.BREAST_UP.<br>V1_UP | 135 | -<br>0.4309287<br>4 | -1.6563247 | 0.0266666<br>67 | 0.0227310<br>23 | 0.407 |
| CAHOY_NEURONAL                | 94  | -<br>0.4599901<br>4 | -1.655503  | 0.0278884<br>47 | 0.0226487<br>33 | 0.408 |
| NFE2L2.V2                     | 411 | -<br>0.3550576<br>3 | -1.5227377 | 0.0301810<br>86 | 0.0457826<br>6  | 0.656 |
| SRC_UP.V1_UP                  | 148 | -<br>0.4105423<br>4 | -1.5533906 | 0.0307101<br>72 | 0.0404956<br>23 | 0.593 |
| P53_DN.V1_UP                  | 184 | -0.3905705          | -1.5518457 | 0.0336633<br>66 | 0.0405067<br>2  | 0.594 |
| NRL_DN.V1_DN                  | 121 | -<br>0.3390013<br>3 | -1.458594  | 0.0368852<br>47 | 0.0656651<br>6  | 0.76  |



|                    |     |                     |            |                 |                 |       |
|--------------------|-----|---------------------|------------|-----------------|-----------------|-------|
| BCAT_GDS748_UP     | 46  | -<br>0.4579789<br>3 | -1.5607423 | 0.0370370<br>37 | 0.0393232<br>55 | 0.577 |
| CAMP_UP.V1_DN      | 186 | -<br>0.4055335<br>2 | -1.5637769 | 0.0376237<br>63 | 0.0390709<br>15 | 0.574 |
| BCAT.100_UP.V1_UP  | 46  | -<br>0.4525393<br>2 | -1.524421  | 0.0391752<br>57 | 0.0462370<br>78 | 0.656 |
| KRAS.DF.V1_UP      | 182 | -<br>0.3839599<br>8 | -1.5589074 | 0.0418326<br>7  | 0.0395311<br>9  | 0.579 |
| KRAS.DF.V1_DN      | 183 | -0.3370468          | -1.4191353 | 0.0419161<br>7  | 0.0810763<br>54 | 0.824 |
| TGFB_UP.V1_DN      | 179 | -<br>0.3216399<br>6 | -1.3935256 | 0.0425101<br>22 | 0.0911034<br>9  | 0.861 |
| SRC_UP.V1_DN       | 152 | -0.3125242          | -1.4091281 | 0.0434782<br>6  | 0.0852913<br>7  | 0.841 |
| PIGF_UP.V1_DN      | 178 | -<br>0.3736156<br>8 | -1.500715  | 0.0449897<br>76 | 0.0514219       | 0.694 |
| CYCLIN_D1_UP.V1_UP | 178 | -<br>0.3406034<br>4 | -1.433372  | 0.0492813<br>14 | 0.0752866<br>6  | 0.804 |
| PRC2_EZH2_UP.V1_UP | 180 | -<br>0.3976676<br>8 | -1.5231307 | 0.05            | 0.0461528<br>93 | 0.656 |

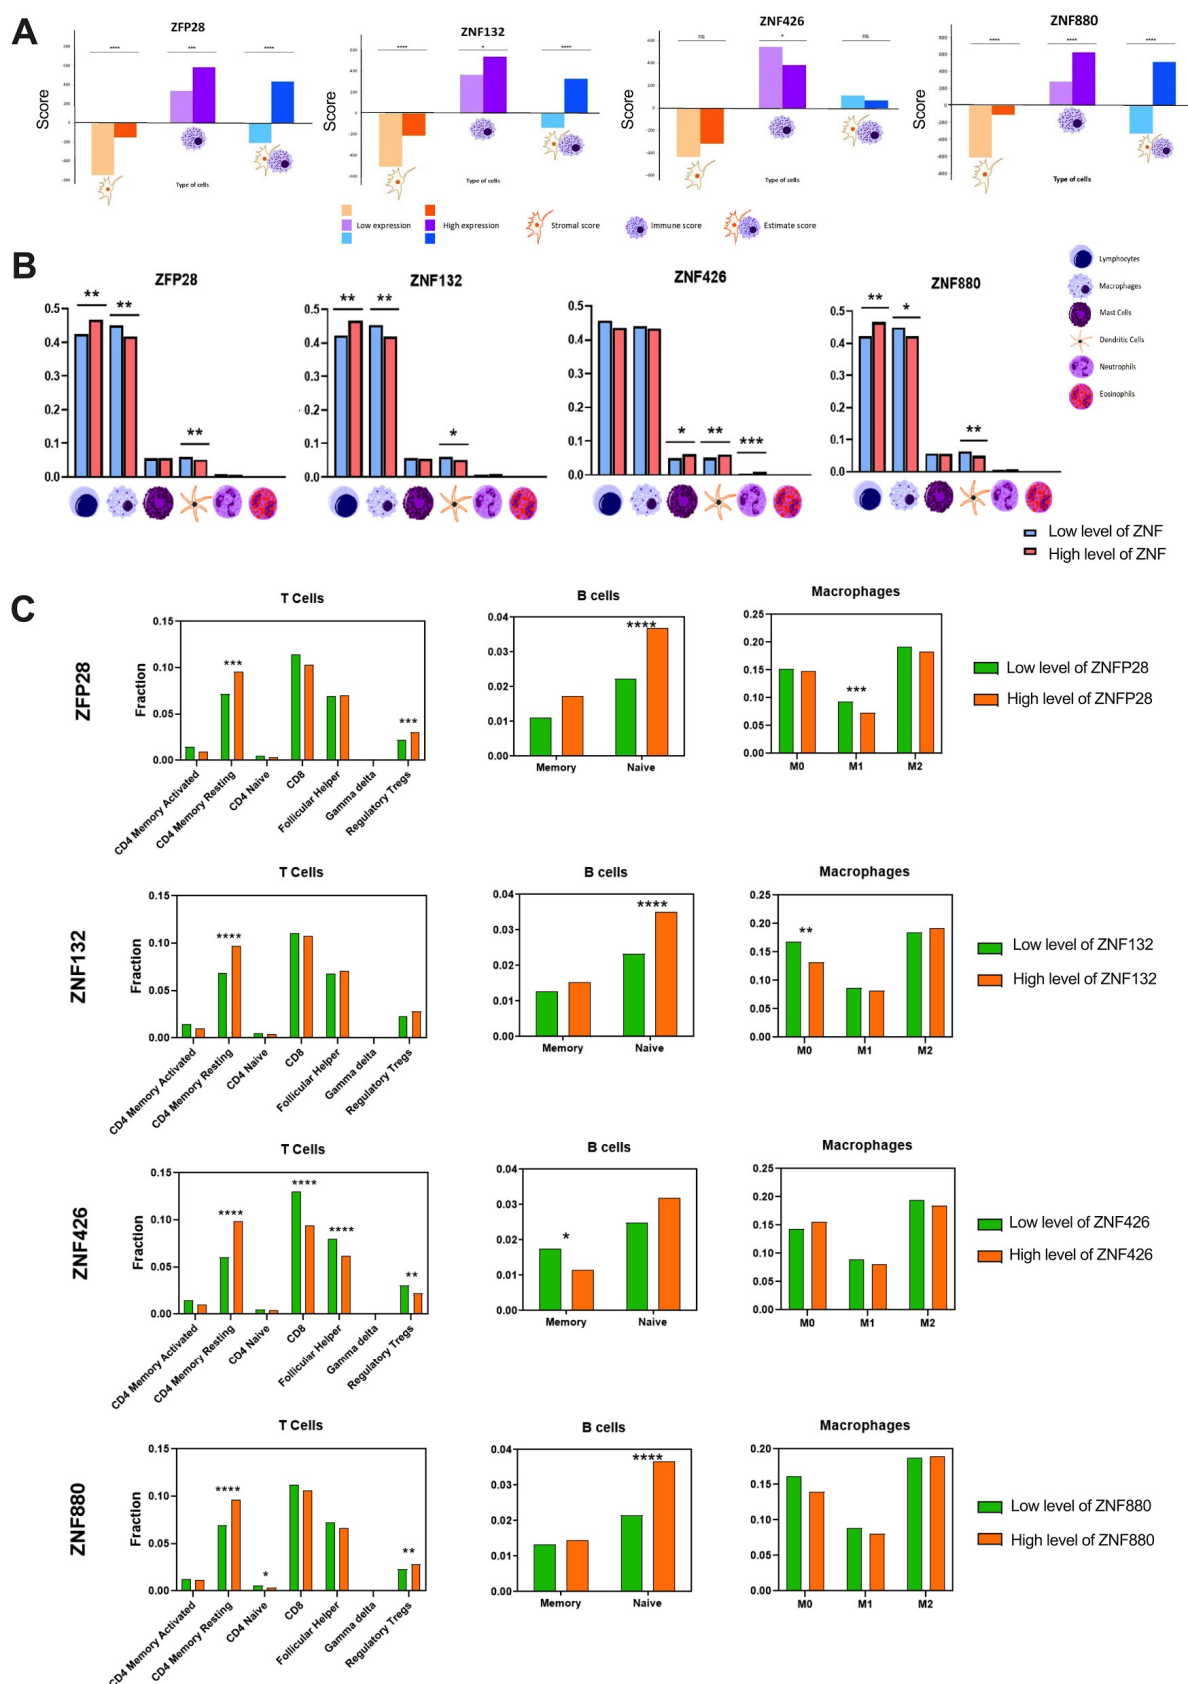

and macrophages; *ns* - not significant; \*  $p \leq 0.05$ ; \*\*  $p \leq 0.01$ ; \*\*\*  $p \leq 0.001$ ; \*\*\*\*  $p \leq 0.0001$  considered as significant.

**Table S4.** Expression level of *ZNF540* depending on clinical-pathological parameters in HNSCC patients from GSE65858; Mann-Whitney U test or one-way ANOVA,  $p < 0.05$  considered as significant.

| Parameter    | Group       | Mean $\pm$ SEM       | P-val  | Cases |
|--------------|-------------|----------------------|--------|-------|
| Age          | <60         | 6.448 $\pm$ 0.01302  | 0.3211 | 157   |
|              | >60         | 6.449 $\pm$ 0.01304  |        | 113   |
| Gender       | Female      | 6.469 $\pm$ 0.02326  | 0.2616 | 47    |
|              | Male        | 6.444 $\pm$ 0.01016  |        | 223   |
| Alcohol      | Positive    | 6.444 $\pm$ 0.009569 | 0.2698 | 239   |
|              | Negative    | 6.487 $\pm$ 0.03356  |        | 31    |
| Smoking      | Positive    | 6.439 $\pm$ 0.009893 | 0.0418 | 222   |
|              | Negative    | 6.491 $\pm$ 0.02489  |        | 48    |
| UICC Stage   | I + II      | 6.431 $\pm$ 0.01561  | 0.8075 | 55    |
|              | III + IV    | 6.453 $\pm$ 0.01100  |        | 215   |
| T stage      | T1 + T2     | 6.454 $\pm$ 0.01377  | 0.4456 | 115   |
|              | T3 + T4     | 6.445 $\pm$ 0.01264  |        | 155   |
| N stage      | N0          | 6.432 $\pm$ 0.01287  | 0.6297 | 94    |
|              | N1+N2+N3    | 6.457 $\pm$ 0.01251  |        | 176   |
| Localization | Oral cavity | 6.423 $\pm$ 0.01353  | > 0.05 | 83    |
|              | Hypopharynx | 6.404 $\pm$ 0.01454  |        | 33    |
|              | Larynx      | 6.416 $\pm$ 0.01448  |        | 48    |
|              | Oropharynx  | 6.498 $\pm$ 0.01893  |        | 102   |
